# Supplementary material for: Bat Accelerated Regions Identify a Bat Forelimb Specific Enhancer in the HoxD Locus
Source: PubMed Central journal article supplement (PMC4809552; doi:10.1371/journal.pgen.1005738), 2016-03-28

*M. lucifugus* **BAR2** (*Twist2*)

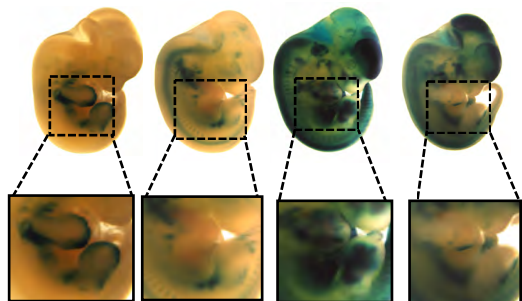

*M. lucifugus* **BAR4** (*Spry1*)

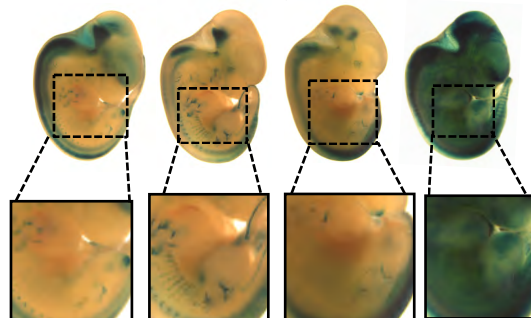

*M. lucifugus* **BAR61** (*Shh*)

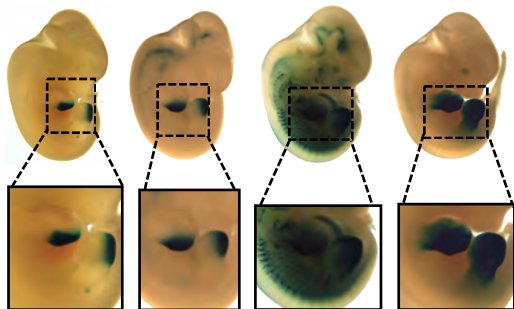

*M. lucifugus* **BAR97** (*Spg20*)

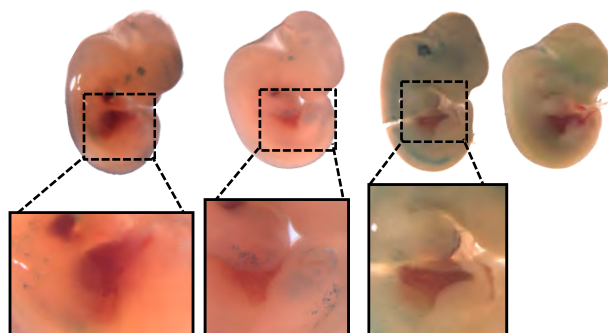

*M. lucifugus* **BAR116** (*HoxD*)

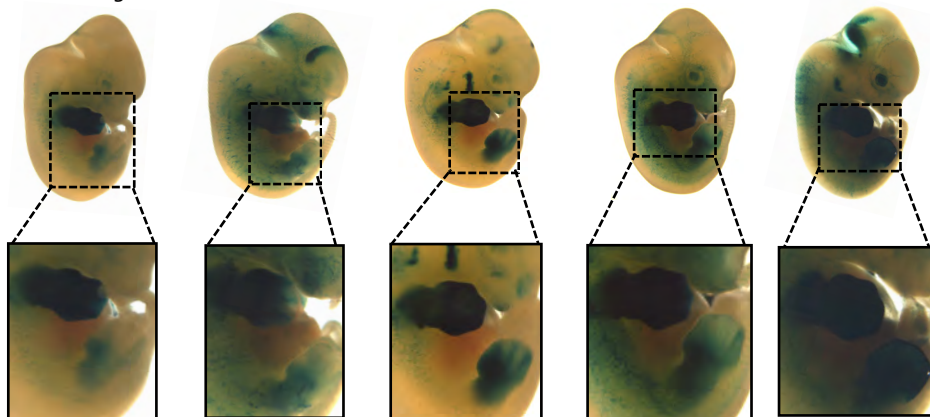

Supplement: pgen.1005738.s001.pdf [file pgen.1005738.s001.pdf]
