# Supplementary material for: Bat Accelerated Regions Identify a Bat Forelimb Specific Enhancer in the HoxD Locus
Source: PubMed Central journal article supplement (PMC4809552; doi:10.1371/journal.pgen.1005738), 2016-03-28

mouse **BAR4** (*Spry1*)

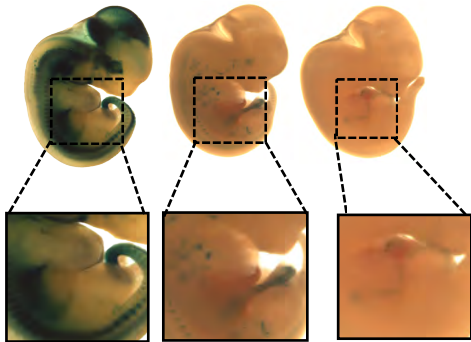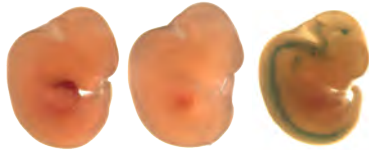

mouse **BAR61** (*Shh*)

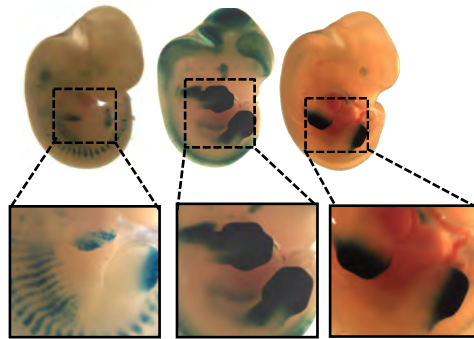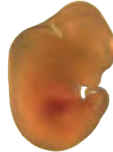

mouse **BAR97** (*Spg20*)

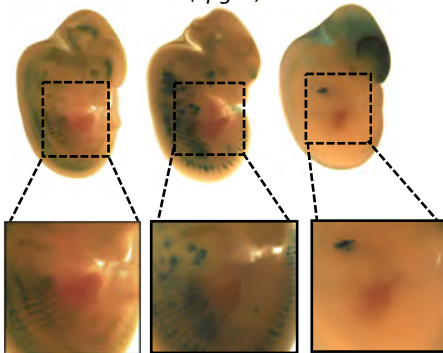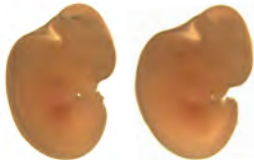

mouse **BAR116** (*HoxD*)

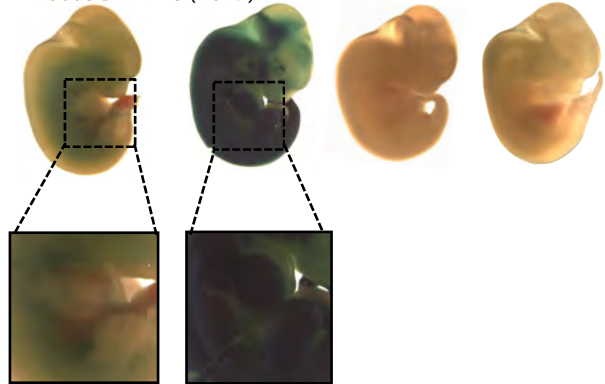

Combined **BAR116** (*HoxD*)

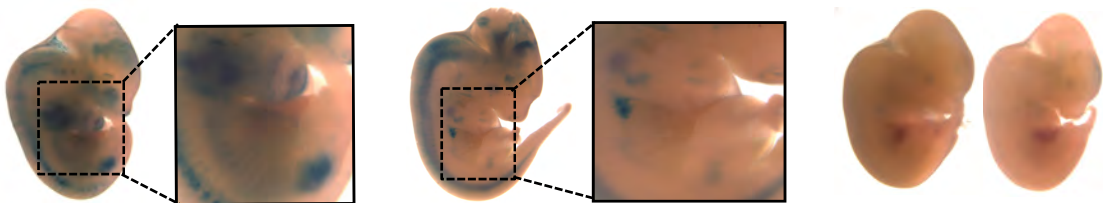

Supplement: pgen.1005738.s002.pdf [file pgen.1005738.s002.pdf]
