# Supplementary material for: Bat Accelerated Regions Identify a Bat Forelimb Specific Enhancer in the HoxD Locus
Source: PLoS Genet. 2016 Mar 28;12(3):e1005738. doi: 10.1371/journal.pgen.1005738 (PMC4809552; doi:10.1371/journal.pgen.1005738)
Supplement: S2 Table — The cloned sequences for M. lucifugus and mouse BARs were analysed for TFBS enrichment and depletion of known limb-associated TFs using motifDiverge [35,95]. We defined a TFBS if it exceeded an FDR of 0.01. TFBSs were tested for significant enrichment or depletion (Adjusted p-value < 0.05) in each cloned M. lucifugus BAR compared to its corresponding cloned mouse BAR. We also inferred the sequence of the common ancestor of the four extant bats for each of the 166 BARs using the prequel program in the PHAST package and compared these to their corresponding mouse sequences. We asked if TFBSs within these sequences were significantly enriched or depleted. All motifDiverge tests were corrected for multiple testing (to control the false discovery rate with the Benjamini-Hochberg method). Lists of all enriched/depleted TFs, limb-associated genes, and transcription factors are also provided. (XLSX) [file pgen.1005738.s004.xlsx]

## Sheet: Table S2 description
Supplemental Table S2. Limb-associated transcription factor binding site analysis.
These 6 spreadsheets list the results of motifDiverge (Kostka et al. 2014) analysis of computationally predicted transcription factor binding sites in bats compared to mouse
Analysis Methods
DNA sequences: An estimated sequence of the common ancestor of the four bats used in this study is compared to the M. musculus (mm10 assembly) genome sequence for each BAR
Transcription factors: We manually curated a list of 745 transcription factors expressed or known to function in limb development
Binding sites: Using motif models from motifDb (jaspar 2014, uniprobe, jolma 2013, stamlab, hPDI) we predicted binding sites for each transcription factor in the ancestral bat and mouse sequence of each BAR
Statistical test: We tested if the total number of binding sites was significantly higher or lower in ancestral bat compared to mouse
Results
The spreadsheet "Ancestral bat vs mouse all BARs" shows results for this analysis performed on the full set of 166 BARs collectively
The spreadsheet "Ancestral bat vs. mouse per BAR" shows results for this analysis performed separately on each BAR
The spreadsheet "Limb-Associated Genes" shows results for all 794 genes used in analysis
The spreadsheet "Limb-Associated TFs" shows results for all 745 TFs used in analysis
The spreadsheet "Anc bat vs mouse all BARs-enr" lists TFs that are enriched in bats
The spreadsheet "Anc bat vs mouse all BARs-dep" lists TFs that are depleted in bats
Column Names
BAR	ID number of the bat accelerated region ("per BAR" spreadsheet only)
Transcription Factor	gene symbol for the transcription factor analyzed for binding site differences
# Ancestral bat TFBS	total number of predicted binding sites for a given transscription factor in the ancestral bat sequence
# M. musculus TFBS	total number of predicted binding sites for a given transscription factor in the mouse sequence
P-value for TFBS gain in ancestral bat	a small p-value means that there are significantly more binding sites for a transcription factor in the ancestral bat versus mouse sequence
P-value for TFBS loss in ancestral bat	a small p-value means that there are significantly fewer binding sites for a transcription factor in the ancestral bat versus mouse sequence
FDR for TFBS gain in ancestral bat	a small FDR means that there are significantly more bindings sites for a transcription factor in the ancestral bat versus mouse sequence after correcting for multiple testing
FDR for TFBS loss in ancestral bat	a small FDR means that there are significantly fewer bindings sites for a transcription factor in the ancestral bat versus mouse sequence after correcting for multiple testing
Number of BARs that show enrichment (FDR < 0.05)	number of BARs that are significantly enriched in the ancestral bat sequence vs the mouse sequence
Number of BARs that show depletion (FDR < 0.05)	number of BARs that are significantly depleted in the ancestral bat sequence vs the mouse sequence

## Sheet: Ancestral bat vs mouse all BARs
Transcription Factor	# Ancestral bat TFBS	# M. musculus (mm10) TFBS	P-value for TFBS gain in ancestral bat	P-value for TFBS loss in ancestral bat	FDR for TFBS gain in ancestral bat	FDR for TFBS loss in ancestral bat
ABCF2	181	213	0.998255	0.00204934	1	0.0109054
ACO1	0	0	1	1	1	1
ADARB1	191	185	0.834127	0.179055	1	0.353835
AFF4	0	0	1	1	1	1
AGGF1	0	0	1	1	1	1
ALX3	2361	2210	0.985995	0.0145493	1	0.0497212
ALX4	2559	2356	0.95467	0.0467268	1	0.132868
ANXA1	21	22	0.742539	0.309112	1	0.526976
ANXA11	0	0	1	1	1	1
APEX2	244	262	0.988654	0.0127394	1	0.0447682
AR	435	506	0.999993	8.50495e-06	1	0.000119551
ARFGAP1	124	139	0.977463	0.026053	1	0.0798744
ARID3A	0	0	1	1	1	1
ARID3A	1848	1694	0.903527	0.0994079	1	0.225789
ARID5A	1435	1297	0.777895	0.227889	1	0.429816
ARNT	0	0	1	1	1	1
ARNTL	107	103	0.756611	0.265529	1	0.475589
ARX	2180	2086	0.997806	0.00230362	1	0.0120014
ASCC1	0	0	1	1	1	1
ASCL2	4168	4073	1	3.38607e-07	1	6.81789e-06
ASPSCR1	85	98	0.969398	0.0360837	1	0.104998
ATF1	3200	3182	1	2.19384e-07	1	5.07764e-06
ATOH1	44	36	0.396628	0.645738	1	0.928716
BARHL1	1655	1559	0.978108	0.0228397	1	0.0714942
BARHL2	754	662	0.504818	0.505828	1	0.765939
BARX1	0	0	1	1	1	1
BARX1	2733	2583	0.996805	0.00333217	1	0.0164402
BARX2	1634	1533	0.970375	0.0308534	1	0.0915767
BAX	0	0	1	1	1	1
BBX	2013	1940	0.99847	0.00161234	1	0.00909994
BCL11A	0	0	1	1	1	1
BCL6	2107	2201	1	4.35323e-09	1	1.90774e-07
BCL6B	3900	3806	0.999999	1.11459e-06	1	1.8872e-05
BHLHB2	3332	3220	0.999965	3.66511e-05	1	0.000413714
BOLL	0	0	1	1	1	1
BRCA1	81	97	0.982086	0.0214907	1	0.0684213
BSX	3308	3238	0.999996	3.93046e-06	1	5.74156e-05
CANX	0	0	1	1	1	1
CAT	242	247	0.953356	0.0512324	1	0.141364
CBFA2T2	130	114	0.506323	0.519228	1	0.778319
CBFB	1169	1164	0.99882	0.00126427	1	0.00772033
CBX3	30	37	0.925955	0.0928043	1	0.21606
CBX7	0	0	1	1	1	1
CCDC25	207	213	0.949596	0.0556823	1	0.14922
CDX1	1757	1633	0.953195	0.0485273	1	0.13659
CDX2	21	19	0.567702	0.495087	1	0.755819
CDX2	1885	1716	0.864471	0.13923	1	0.293012
CEBPA	140	121	0.460297	0.564202	1	0.827423
CEBPB	202	175	0.456843	0.56354	1	0.827423
CEBPG	256	298	0.999564	0.000507094	1	0.00377785
CFL2	0	0	1	1	1	1
CLK1	0	0	1	1	1	1
CNOT6	59	58	0.74281	0.287932	1	0.500022
CPHX	2920	2938	1	6.34332e-08	1	2.14808e-06
CPSF4	0	0	1	1	1	1
CREB1	0	0	1	1	1	1
CREB1	257	261	0.952556	0.051959	1	0.141793
CREB3L1	0	0	1	1	1	1
CRX	91	99	0.934421	0.0753648	1	0.183486
CRX	2479	2372	0.998807	0.00125224	1	0.00771004
CSNK2B	0	0	1	1	1	1
CSTF2	0	0	1	1	1	1
CTCF	1708	1498	0.49376	0.513352	1	0.774184
CUTL1	3790	3632	0.999942	6.08492e-05	1	0.000620996
CUTL1	1941	1727	0.658901	0.347244	1	0.570929
CYB5R1	1	5	0.977592	0.0537923	1	0.1452
CYCS	0	0	1	1	1	1
DAB2	0	0	1	1	1	1
DAZAP1	0	0	1	1	1	1
DBX1	682	683	0.992885	0.00767064	1	0.0296095
DBX2	1199	1123	0.942165	0.060293	1	0.158163
DDX20	166	154	0.695992	0.323853	1	0.543402
DDX4	0	0	1	1	1	1
DGCR8	55	62	0.918177	0.0967682	1	0.221142
DHX36	71	67	0.677322	0.353832	1	0.576816
DIABLO	189	167	0.531203	0.489932	1	0.751027
DIS3	0	0	1	1	1	1
DLX1	1846	1700	0.924112	0.0783417	1	0.188882
DLX2	2534	2465	0.999882	0.000124873	1	0.0011421
DLX3	2693	2534	0.994539	0.00568495	1	0.0239399
DLX4	2787	2607	0.991016	0.00932483	1	0.0340539
DLX5	3349	3346	1	3.78959e-08	1	1.41162e-06
DLX6	0	0	1	1	1	1
DMBX1	2113	1946	0.938859	0.0630851	1	0.160954
DNMT3A	0	0	1	1	1	1
DTL	31	27	0.512315	0.54001	1	0.801835
DUS3L	0	0	1	1	1	1
DUSP22	0	0	1	1	1	1
DUSP26	0	0	1	1	1	1
E2F1	1	1	0.687673	0.619935	1	0.898544
E2F2	767	532	1.43451e-05	0.999987	0.000667945	1
E2F3	18	8	0.0630571	0.957674	1	1
E2F3	871	594	9.63897e-07	0.999999	5.12931e-05	1
E2F4	4	4	0.642103	0.499098	1	0.758832
E2F6	5	4	0.509637	0.623697	1	0.900492
EBF1	0	0	1	1	1	1
EBF1	297	265	0.581518	0.435053	1	0.683142
ECSIT	0	0	1	1	1	1
EDN1	83	76	0.617457	0.413159	1	0.659108
EEF1D	51	54	0.84235	0.182377	1	0.359446
EGR1	72	43	0.0249988	0.979958	0.809743	1
EGR1	242	69	2.66825e-18	1	1.65654e-16	1
EGR2	127	144	0.98354	0.0191208	1	0.0619348
EHF	29	30	0.755159	0.287615	1	0.500022
EHF	2216	2174	0.999901	0.000105144	1	0.00100426
EIF5A2	42	48	0.903031	0.116379	1	0.256515
ELF1	25	26	0.749271	0.297405	1	0.511701
ELF2	0	0	1	1	1	1
ELF3	1481	1454	0.998849	0.00122472	1	0.0076035
ELF5	580	578	0.984712	0.0164602	1	0.0542604
ELK1	173	180	0.946946	0.0590668	1	0.156045
ELK4	128	120	0.706535	0.315705	1	0.535763
EMX2	3255	3215	0.999999	7.34192e-07	1	1.27203e-05
EN1	1150	1141	0.998358	0.00175654	1	0.00969351
EN1	1942	1843	0.992266	0.00809054	1	0.0307523
EN2	2573	2434	0.996325	0.00383513	1	0.0183152
ENO1	0	0	1	1	1	1
EOMES	2059	2000	0.999445	0.00058688	1	0.00416405
ERG	50	52	0.816273	0.211269	1	0.402546
ESR1	2318	2262	0.999862	0.000146623	1	0.00131607
ESR2	3889	3822	1	2.27583e-07	1	5.07764e-06
ESRRA	28	28	0.708474	0.339042	1	0.563808
ESRRA	913	908	0.996214	0.00406057	1	0.0191463
ESRRA	3908	3795	0.999997	3.20136e-06	1	4.86737e-05
ESRRB	3430	3401	1	1.71691e-07	1	4.4577e-06
ESX1	0	0	1	1	1	1
ESX1	1560	1432	0.891499	0.111975	1	0.250611
ETFB	0	0	1	1	1	1
ETS1	0	0	1	1	1	1
ETS1	135	135	0.863815	0.149935	1	0.308899
ETV4	0	0	1	1	1	1
EVX1	0	0	1	1	1	1
EVX1	2939	2940	1	1.91442e-07	1	4.75414e-06
EVX2	3478	3444	1	1.73521e-07	1	4.4577e-06
EWSR1	36	37	0.766381	0.271027	1	0.48075
FEV	73	88	0.979556	0.0246746	1	0.0762763
FEZ1	0	0	1	1	1	1
FEZF2	60	51	0.449121	0.588155	1	0.857486
FHL2	30	21	0.232717	0.807754	1	1
FIP1L1	248	257	0.969732	0.0334536	1	0.0981218
FLI1	10	11	0.734409	0.342365	1	0.564296
FLI1	46	41	0.54779	0.494888	1	0.755819
FOS	199	190	0.801335	0.213121	1	0.402983
FOSL1	67	67	0.785617	0.240479	1	0.444558
FOSL1	198	197	0.896619	0.112729	1	0.250696
FOSL2	348	360	0.985967	0.015437	1	0.0522753
FOXA1	363	352	0.910752	0.0954497	1	0.219475
FOXA2	353	347	0.934304	0.0706776	1	0.174608
FOXA2	1025	945	0.86423	0.140772	1	0.294593
FOXC1	236	260	0.994491	0.00625947	1	0.025344
FOXD1	12	14	0.793649	0.266841	1	0.475589
FOXD3	110	105	0.739914	0.282701	1	0.495558
FOXF2	13	15	0.792509	0.265795	1	0.475589
FOXH1	15	19	0.874917	0.164097	1	0.331109
FOXI1	67	64	0.69928	0.331838	1	0.555549
FOXJ1	937	922	0.99338	0.00706523	1	0.0275581
FOXJ3	911	904	0.995732	0.00457414	1	0.0205285
FOXK1	865	821	0.947056	0.0556383	1	0.14922
FOXL1	325	285	0.498308	0.517868	1	0.777846
FOXL1	654	593	0.72027	0.289372	1	0.501354
FOXM1	228	224	0.886507	0.122809	1	0.267523
FOXN3	79	78	0.778993	0.245459	1	0.452641
FOXO1	155	139	0.581543	0.441381	1	0.687926
FOXP1	70	87	0.986589	0.0164226	1	0.0542604
FOXP2	63	58	0.61868	0.416434	1	0.6615
FOXP4	6	6	0.644584	0.469077	1	0.723524
FOXQ1	70	63	0.572167	0.462109	1	0.717232
GABPA	203	185	0.650535	0.368458	1	0.596742
GABPA	2041	2093	1	2.31731e-07	1	5.07764e-06
GADD45A	0	0	1	1	1	1
GATA1	30	33	0.83015	0.203711	1	0.391721
GATA2	132	124	0.715412	0.306176	1	0.52437
GATA3	0	0	1	1	1	1
GATA3	1266	1139	0.733293	0.273499	1	0.482836
GATA4	56	64	0.931441	0.0815027	1	0.19405
GATA5	1529	1486	0.997594	0.00254742	1	0.0130885
GATA6	1685	1604	0.990511	0.00994651	1	0.0357978
GBX1	2090	2056	0.999896	0.000110478	1	0.00104185
GBX2	3131	3085	0.999998	1.9338e-06	1	3.13192e-05
GCM1	1511	1319	0.441788	0.565683	1	0.827964
GFI1	346	292	0.313663	0.700264	1	0.989936
GFI1B	570	549	0.940284	0.0633597	1	0.161102
GIT2	128	120	0.705334	0.316945	1	0.536646
GLIS2	1151	481	6.12345e-45	1	9.12394e-43	1
GM397	4701	4908	1	1.35289e-18	1	5.0395e-16
GMEB1	1443	1234	0.250496	0.75566	1	1
GOT1	0	0	1	1	1	1
GPAM	0	0	1	1	1	1
GPD1	0	0	1	1	1	1
GRHL1	26	28	0.792325	0.248852	1	0.456214
GRHPR	0	0	1	1	1	1
GSC	2040	1937	0.993828	0.00645697	1	0.0257576
GTF2B	114	121	0.930424	0.0787286	1	0.189203
GTF2H3	0	0	1	1	1	1
GTF3C2	0	0	1	1	1	1
GTPBP1	0	0	1	1	1	1
GTPBP6	222	223	0.924276	0.0827258	1	0.195653
H1FX	68	77	0.941567	0.068803	1	0.171432
H2AFY	326	308	0.824849	0.185604	1	0.363882
H2AFZ	42	51	0.946412	0.0659131	1	0.166458
HBP1	2108	2072	0.99989	0.000116887	1	0.00108851
HCFC2	143	119	0.341819	0.680584	1	0.967218
HCLS1	23	16	0.261505	0.787704	1	1
HDAC8	0	0	1	1	1	1
HDX	2754	2589	0.994452	0.00577276	1	0.0239399
HES5	37	23	0.106968	0.914884	1	1
HHAT	0	0	1	1	1	1
HHEX	280	255	0.667943	0.347922	1	0.570929
HIC1	2237	2110	0.991659	0.00869713	1	0.032724
HIST1H2BN	11	16	0.918717	0.114483	1	0.253839
HIST2H2AB	461	448	0.937649	0.0665384	1	0.16747
HIST2H2BE	80	66	0.368136	0.662589	1	0.947464
HLCS	0	0	1	1	1	1
HLF	835	718	0.342356	0.66696	1	0.951887
HLTF	340	313	0.731306	0.281781	1	0.495111
HMBOX1	2611	2616	0.999999	6.65303e-07	1	1.18012e-05
HMG20A	0	0	1	1	1	1
HMX1	2510	2419	0.999553	0.000471192	1	0.00354584
HMX2	1717	1598	0.955436	0.046238	1	0.131982
HMX3	1673	1547	0.931893	0.0704771	1	0.174608
HNF1A	520	478	0.769493	0.240272	1	0.444558
HNF1B	9	16	0.966294	0.0518129	1	0.141793
HNF4A	3524	3527	1	1.10204e-08	1	4.32115e-07
HNF4A	3208	2975	0.985846	0.0146274	1	0.04976
HNF4G	3461	3499	1	1.07434e-09	1	5.07152e-08
HNRNPA1	315	278	0.529902	0.486483	1	0.747279
HNRNPC	112	107	0.742613	0.279676	1	0.492573
HOMEZ	1670	1435	0.276659	0.72937	1	1
HOXA1	2310	2160	0.98357	0.0170611	1	0.055748
HOXA10	1159	1056	0.811693	0.194133	1	0.376639
HOXA11	2092	1981	0.992705	0.0076223	1	0.0295761
HOXA13	2582	2426	0.992538	0.00776343	1	0.0298132
HOXA2	2706	2561	0.997152	0.00297243	1	0.0149626
HOXA3	2450	2316	0.995052	0.00516208	1	0.0224898
HOXA3	2510	2323	0.967989	0.0330726	1	0.0973876
HOXA4	1574	1455	0.924528	0.0781145	1	0.188882
HOXA5	798	804	0.997113	0.00311639	1	0.015582
HOXA5	2590	2441	0.994619	0.0056058	1	0.0238647
HOXA6	2146	1977	0.941166	0.0607063	1	0.158372
HOXA7	2567	2371	0.964912	0.0362207	1	0.104998
HOXA7	2567	2449	0.998579	0.00148879	1	0.00856302
HOXA9	292	256	0.499388	0.517676	1	0.777846
HOXA9	1737	1565	0.775475	0.229824	1	0.431418
HOXB13	14	9	0.263206	0.800157	1	1
HOXB13	849	720	0.249844	0.758144	1	1
HOXB3	3147	3140	1	1.27731e-07	1	3.80637e-06
HOXB4	1847	1712	0.949441	0.0523459	1	0.142116
HOXB5	2442	2348	0.999285	0.000752001	1	0.00513983
HOXB6	2629	2478	0.994967	0.00524314	1	0.0227101
HOXB7	1965	1861	0.991113	0.00928745	1	0.0340539
HOXB8	1853	1745	0.983236	0.0174789	1	0.0568636
HOXB9	0	0	1	1	1	1
HOXB9	1394	1279	0.875309	0.128743	1	0.276408
HOXC10	2585	2405	0.981091	0.0195825	1	0.0631558
HOXC11	2073	1975	0.99574	0.00446408	1	0.020156
HOXC12	2640	2472	0.990328	0.0100462	1	0.0359828
HOXC13	2154	2041	0.993791	0.00648795	1	0.0257576
HOXC4	1687	1568	0.950149	0.0516983	1	0.141793
HOXC5	1836	1685	0.908826	0.0939983	1	0.218158
HOXC6	1551	1441	0.941391	0.0607977	1	0.158372
HOXC8	1775	1629	0.90458	0.0983896	1	0.22416
HOXC9	737	670	0.745601	0.263061	1	0.475563
HOXC9	2747	2546	0.977241	0.0235238	1	0.0733272
HOXD1	3057	2895	0.998522	0.0015426	1	0.00877278
HOXD10	990	892	0.717297	0.290594	1	0.502303
HOXD11	2507	2340	0.984754	0.0158149	1	0.053186
HOXD12	2637	2460	0.986107	0.014405	1	0.0494548
HOXD13	952	847	0.614902	0.39419	1	0.631552
HOXD3	64	61	0.690562	0.341679	1	0.564296
HOXD3	2721	2655	0.999958	4.49026e-05	1	0.000484818
HOXD8	871	829	0.953646	0.0487692	1	0.13659
HP1BP3	68	77	0.941567	0.068803	1	0.171432
HSF1	695	709	0.997576	0.0026345	1	0.0134432
HSF1	1872	1938	1	1.49169e-07	1	4.11596e-06
HSPA1L	0	0	1	1	1	1
HSPA5	2	3	0.799078	0.353167	1	0.576816
ID2	0	0	1	1	1	1
ING3	218	243	0.995001	0.0057149	1	0.0239399
INSM1	166	191	0.994953	0.00587455	1	0.0240469
INSM1	149	129	0.464206	0.559565	1	0.823866
IRF1	0	0	1	1	1	1
IRF1	268	294	0.996174	0.00433463	1	0.020141
IRF2	12	5	0.0944816	0.939789	1	1
IRF3	834	784	0.916906	0.0869824	1	0.20378
IRF4	1600	1588	0.999761	0.000254981	1	0.00215865
IRF5	1184	1182	0.999177	0.000882826	1	0.00576934
IRF6	131	133	0.885595	0.126761	1	0.272939
IRF6	1612	1636	0.999985	1.6206e-05	1	0.000201225
IRX2	2049	1979	0.998914	0.00114494	1	0.00716791
IRX3	2311	2314	0.999997	3.12243e-06	1	4.84627e-05
IRX3	2101	2084	0.999968	3.40692e-05	1	0.000390485
IRX4	1851	1835	0.999905	0.000101977	1	0.000986665
IRX5	2226	2188	0.999928	7.6135e-05	1	0.000766494
IRX6	1807	1780	0.999755	0.000260567	1	0.00218115
ISGF3G	912	920	0.998616	0.00149422	1	0.00856302
ISL2	1145	1068	0.924799	0.0782831	1	0.188882
ISX	3407	3300	0.999979	2.19037e-05	1	0.00025902
IVD	0	0	1	1	1	1
JUN	268	277	0.972755	0.030053	1	0.0896267
JUNB	168	156	0.700728	0.31886	1	0.538664
JUNDM2	3342	3226	0.999955	4.7918e-05	1	0.000502801
KCNIP1	215	191	0.556245	0.463442	1	0.717805
KIF22	0	0	1	1	1	1
KLF1	23	21	0.579903	0.479749	1	0.738457
KLF3	206	183	0.552609	0.467524	1	0.722625
KLF4	0	0	1	1	1	1
KLF4	63	47	0.211779	0.814734	1	1
KLF5	38	28	0.259483	0.778707	1	1
KLF7	473	262	8.88287e-10	1	5.09057e-08	1
LARP1	86	82	0.714574	0.312231	1	0.531077
LARP4	521	530	0.991671	0.00905782	1	0.0335725
LAS1L	0	0	1	1	1	1
LBX2	2628	2487	0.996778	0.0033637	1	0.0164866
LEF1	2479	2453	0.99999	1.07706e-05	1	0.000143288
LHX1	921	862	0.913993	0.0898058	1	0.209735
LHX2	0	0	1	1	1	1
LHX2	2290	2175	0.996138	0.00404002	1	0.0191463
LHX3	11	7	0.288887	0.786089	1	1
LHX3	731	681	0.870607	0.135113	1	0.286778
LHX4	0	0	1	1	1	1
LHX4	2612	2522	0.99973	0.00028508	1	0.00233389
LHX5	909	839	0.855442	0.150096	1	0.308899
LHX6	2427	2296	0.995385	0.00481796	1	0.0212389
LHX6	3336	3157	0.998965	0.00107942	1	0.006815
LHX8	3728	3634	0.999998	2.39679e-06	1	3.79917e-05
LHX9	1927	1809	0.980892	0.0198921	1	0.0638777
LMX1A	936	871	0.894667	0.109708	1	0.247674
LMX1B	637	558	0.49021	0.521362	1	0.779949
LSM6	0	0	1	1	1	1
MAFB	883	894	0.998698	0.00140769	1	0.00825774
MAFB	4343	4354	1	1.18668e-10	1	6.47756e-09
MAFF	2185	2218	0.999999	5.63063e-07	1	1.0487e-05
MAFK	697	718	0.998758	0.00135597	1	0.00801741
MAFK	3504	3475	1	1.14229e-07	1	3.54587e-06
MAGEA8	68	77	0.941567	0.068803	1	0.171432
MAGOH	56	61	0.886653	0.132163	1	0.281318
MAP4K2	180	207	0.996214	0.00440049	1	0.020141
MAPK1	0	0	1	1	1	1
MAX	55	55	0.766001	0.264273	1	0.475563
MAX	2674	2506	0.991413	0.00892205	1	0.0334016
MBTPS2	50	54	0.86444	0.158128	1	0.322755
MCTP2	0	0	1	1	1	1
MDM2	42	43	0.775735	0.258107	1	0.468999
MECP2	0	0	1	1	1	1
MEF2A	417	337	0.132254	0.875401	1	1
MEF2C	407	363	0.592363	0.421715	1	0.665631
MEIS1	523	588	0.999983	1.96405e-05	1	0.000239871
MEIS1	4372	4429	1	3.15809e-12	1	3.36111e-10
MEOX1	3123	3052	0.999991	9.73459e-06	1	0.000134301
MEX3C	60	66	0.904087	0.112018	1	0.250611
MLX	41	36	0.521008	0.524445	1	0.782989
MORN1	0	0	1	1	1	1
MRG2	4298	4346	1	9.12641e-12	1	7.55464e-10
MRPL1	335	356	0.994164	0.00649991	1	0.0257576
MRPL2	94	96	0.858318	0.158606	1	0.322845
MRPS25	164	171	0.944556	0.0618379	1	0.159963
MSI1	139	158	0.987614	0.0143759	1	0.0494548
MSI2	0	0	1	1	1	1
MSRA	0	0	1	1	1	1
MSRB3	0	0	1	1	1	1
MSX1	1390	1314	0.973836	0.0273636	1	0.0832078
MSX2	2957	2843	0.999783	0.0002278	1	0.0019507
MSX3	1023	941	0.851974	0.153333	1	0.313828
MTF1	2885	2645	0.94899	0.052459	1	0.142116
MTHFD1	0	0	1	1	1	1
MXD4	153	174	0.99082	0.0106412	1	0.0377508
MYB	185	185	0.8982	0.111362	1	0.250611
MYB	2770	2605	0.994783	0.00542845	1	0.0233056
MYBL1	2879	2676	0.984685	0.0158487	1	0.053186
MYC	133	131	0.831275	0.184694	1	0.363053
MYCN	9	8	0.557182	0.5403	1	0.801835
MYEF2	0	0	1	1	1	1
MYF6	393	398	0.978003	0.0239356	1	0.0743002
MYF6	4223	4256	1	4.16086e-11	1	2.81804e-09
MYLK	0	0	1	1	1	1
MYOD1	75	71	0.687833	0.342058	1	0.564296
MYOD1	262	290	0.996929	0.00349359	1	0.0169008
MYOG	88	90	0.853451	0.164443	1	0.331109
NANOS1	0	0	1	1	1	1
NAP1L1	0	0	1	1	1	1
NCALD	9	5	0.241068	0.834035	1	1
NCBP2	0	0	1	1	1	1
NELFB	28	33	0.886706	0.139908	1	0.293609
NFATC2	250	231	0.716585	0.299074	1	0.513387
NFATC3	0	0	1	1	1	1
NFATC4	0	0	1	1	1	1
NFE2L2	557	569	0.994746	0.00572383	1	0.0239399
NFIB	0	0	1	1	1	1
NFIC	3284	3335	1	1.08919e-09	1	5.07152e-08
NFIL3	0	0	1	1	1	1
NFIL3	139	121	0.483318	0.541373	1	0.801835
NFIX	0	0	1	1	1	1
NFKB1	1120	1072	0.978746	0.0223746	1	0.0703335
NFYA	1959	1950	0.999965	3.75378e-05	1	0.000417398
NFYB	46	39	0.457026	0.585658	1	0.85552
NHLH1	665	592	0.599502	0.411476	1	0.657832
NKX1-2	2827	2707	0.999484	0.000541974	1	0.0039201
NKX2-2	3578	3636	1	1.21726e-10	1	6.47756e-09
NKX2-3	438	456	0.994693	0.0058405	1	0.0240396
NKX2-3	3658	3654	1	9.46889e-09	1	3.91907e-07
NKX2-4	2289	2220	0.999645	0.000375171	1	0.00291678
NKX2-5	249	210	0.339109	0.677829	1	0.96555
NKX2-5	2963	2897	0.999986	1.49251e-05	1	0.000191711
NKX2-6	1984	1952	0.999849	0.000160363	1	0.00140553
NKX2-9	3186	3120	0.999995	5.29065e-06	1	7.57988e-05
NKX3-1	323	324	0.955795	0.0480109	1	0.136001
NKX3-1	3135	3055	0.999985	1.55247e-05	1	0.000196032
NKX3-1	2489	2461	0.999989	1.17468e-05	1	0.000153532
NKX3-2	295	281	0.83897	0.171438	1	0.342417
NKX6-1	1625	1451	0.684443	0.322054	1	0.541603
NKX6-1	1542	1413	0.880296	0.123451	1	0.268137
NKX6-3	1463	1348	0.902603	0.100712	1	0.228056
NME1	60	53	0.530275	0.507242	1	0.766522
NMI	380	385	0.976684	0.025387	1	0.0781543
NMRAL1	0	0	1	1	1	1
NNT	0	0	1	1	1	1
NOBOX	371	330	0.57167	0.443232	1	0.689369
NONO	85	90	0.89799	0.116131	1	0.256515
NR2C2	23357	429	0	1	0	1
NR2E3	137	145	0.944227	0.0628005	1	0.160778
NR2F1	0	0	1	1	1	1
NR2F1	296	321	0.995882	0.00463526	1	0.0206782
NR2F2	3086	3097	1	4.72014e-08	1	1.67452e-06
NR4A1	381	425	0.99967	0.000375854	1	0.00291678
NR4A2	95	86	0.593518	0.435561	1	0.683142
NR4A2	191	195	0.933142	0.073718	1	0.180658
NR5A2	1269	1275	0.999696	0.000327392	1	0.00262265
NRF1	31	22	0.242782	0.79799	1	1
NRL	0	0	1	1	1	1
NUCB1	51	50	0.725208	0.308985	1	0.526976
NUP107	237	237	0.923652	0.0831676	1	0.196075
NUP133	0	0	1	1	1	1
NXPH3	125	115	0.650577	0.373619	1	0.603788
OBOX1	1973	1819	0.936498	0.0655732	1	0.166163
OBOX3	2377	2142	0.81379	0.190278	1	0.37039
OBOX5	2201	1971	0.74288	0.262201	1	0.47528
OBOX5	1770	1585	0.720552	0.285342	1	0.499014
OBOX6	2060	1890	0.918928	0.0835173	1	0.196279
ODC1	0	0	1	1	1	1
OLIG1	120	110	0.637807	0.387201	1	0.621692
OLIG3	335	315	0.811486	0.19931	1	0.385678
OSR1	3090	3273	1	1.36173e-14	1	2.53622e-12
OSR2	3206	3496	1	8.50058e-20	1	6.33293e-17
OTP	1714	1489	0.385206	0.621596	1	0.899201
OTUD4	0	0	1	1	1	1
OTX1	1069	976	0.815571	0.190415	1	0.37039
OTX2	2196	2064	0.987935	0.0125607	1	0.0443493
P4HB	0	0	1	1	1	1
PAX2	3088	2927	0.998615	0.00144555	1	0.00841356
PAX3	273	279	0.963993	0.0395104	1	0.11365
PAX4	666	272	7.95664e-28	1	6.58633e-26	1
PAX4	2392	2263	0.995143	0.00507042	1	0.0222204
PAX5	1179	1149	0.99455	0.00578413	1	0.0239399
PAX6	871	857	0.991418	0.00916237	1	0.0337919
PAX6	1303	1261	0.993569	0.00680022	1	0.026664
PAX7	2410	2332	0.999659	0.000359309	1	0.00284772
PAXIP1	189	216	0.99618	0.00442426	1	0.020141
PBX1	11	12	0.734386	0.338748	1	0.563808
PBX1	1662	1603	0.996692	0.00348835	1	0.0169008
PCK2	33	12	0.00447741	0.997123	0.175562	1
PDCD11	137	145	0.944227	0.0628005	1	0.160778
PDE6H	85	96	0.957699	0.0494496	1	0.137434
PDLIM5	0	0	1	1	1	1
PDS5A	66	47	0.145812	0.87461	1	1
PDX1	295	293	0.933794	0.0716859	1	0.176258
PGAM2	0	0	1	1	1	1
PHLDA2	0	0	1	1	1	1
PHOX2A	0	0	1	1	1	1
PHOX2A	2446	2314	0.995486	0.00471135	1	0.0208926
PHOX2B	1671	1585	0.987165	0.0134326	1	0.0467629
PHTF1	0	0	1	1	1	1
PICK1	244	269	0.995209	0.00544318	1	0.0233056
PIK3C3	0	0	1	1	1	1
PIR	0	0	1	1	1	1
PITX1	131	129	0.828344	0.187922	1	0.36746
PITX1	1924	1756	0.883746	0.119546	1	0.261283
PITX2	1898	1838	0.998786	0.00128273	1	0.00776935
PITX3	1905	1799	0.987561	0.0129839	1	0.0454132
PKNOX1	4202	4251	1	1.33439e-11	1	9.94122e-10
PKNOX2	0	0	1	1	1	1
PKNOX2	4308	4358	1	7.44038e-12	1	6.92885e-10
PLAG1	8	4	0.21292	0.860915	1	1
PLAGL1	0	0	1	1	1	1
PLAGL1	685	309	2.25482e-23	1	1.52713e-21	1
PLG	0	0	1	1	1	1
POLE3	164	158	0.803007	0.212833	1	0.402983
POLI	0	0	1	1	1	1
POU1F1	827	791	0.959045	0.0431973	1	0.123777
POU2F1	851	806	0.940367	0.0626169	1	0.160778
POU2F2	353	330	0.797963	0.213008	1	0.402983
POU2F2	2570	2465	0.99927	0.000766852	1	0.00514689
POU2F3	1708	1641	0.995794	0.00442773	1	0.020141
POU3F1	706	645	0.772019	0.236318	1	0.439045
POU3F2	259	250	0.860135	0.149976	1	0.308899
POU3F2	1188	1151	0.991909	0.00856392	1	0.0323864
POU3F3	1808	1667	0.928176	0.0742009	1	0.181245
POU3F4	674	654	0.967134	0.0349388	1	0.102076
POU4F3	0	0	1	1	1	1
POU4F3	1185	1095	0.891536	0.11244	1	0.250696
POU6F1	2743	2624	0.999298	0.000736564	1	0.00508093
POU6F1	2181	2090	0.998126	0.00196831	1	0.0106633
PPARG	925	937	0.999086	0.00098897	1	0.00635158
PPP1R10	0	0	1	1	1	1
PPP5C	404	435	0.99847	0.00171092	1	0.0095122
PQBP1	421	397	0.847712	0.160691	1	0.325313
PRDM1	227	204	0.604024	0.414671	1	0.660106
PRDX5	0	0	1	1	1	1
PRKRIR	12	14	0.793649	0.266841	1	0.475589
PRNP	0	0	1	1	1	1
PROP1	955	847	0.589924	0.419308	1	0.663236
PRRX1	89	89	0.815674	0.204967	1	0.392547
PRRX1	1801	1741	0.998123	0.00198126	1	0.0106633
PRRX2	0	0	1	1	1	1
PRRX2	2281	2189	0.998719	0.00134629	1	0.00801741
PSMA6	195	183	0.746661	0.270095	1	0.48024
PSMC2	185	175	0.767202	0.249234	1	0.456214
PTCD1	106	109	0.882272	0.131746	1	0.281233
PTPMT1	0	0	1	1	1	1
PURG	53	61	0.931546	0.0817427	1	0.19405
R3HDM2	0	0	1	1	1	1
RAB14	10	7	0.364689	0.722363	1	1
RAB18	0	0	1	1	1	1
RAN	21	26	0.893645	0.135724	1	0.287102
RARA	0	0	1	1	1	1
RARA	3915	3853	1	1.4354e-07	1	4.11298e-06
RARB	0	0	1	1	1	1
RARG	0	0	1	1	1	1
RAX	83	79	0.707518	0.320081	1	0.539503
RAX	2204	2079	0.991358	0.0090119	1	0.0335693
RBBP5	0	0	1	1	1	1
RBBP9	0	0	1	1	1	1
RBM17	0	0	1	1	1	1
RBM22	257	234	0.661746	0.354933	1	0.577347
RBM3	0	0	1	1	1	1
RBM7	0	0	1	1	1	1
RBM8A	266	289	0.99415	0.0065964	1	0.0260017
RBMS1	0	0	1	1	1	1
REL	508	471	0.804951	0.204009	1	0.391721
RELA	196	197	0.912975	0.0953007	1	0.219475
REST	1610	1580	0.999284	0.000761059	1	0.00514689
RFC2	0	0	1	1	1	1
RFX1	525	509	0.946102	0.0573991	1	0.15327
RFX2	1898	1856	0.999591	0.000433559	1	0.00332991
RFX3	9	8	0.557254	0.540227	1	0.801835
RFX3	2736	2762	1	6.88621e-08	1	2.23053e-06
RFX4	0	0	1	1	1	1
RFX4	2033	2085	1	2.47675e-07	1	5.1255e-06
RFX5	668	600	0.661578	0.348791	1	0.571098
RFXANK	26	28	0.792232	0.248955	1	0.456214
RFXDC2	1894	1942	0.999999	6.45657e-07	1	1.17321e-05
RHOX11	4055	3866	0.999913	9.1414e-05	1	0.000908046
RHOX11	4017	3893	0.999997	3.65983e-06	1	5.45315e-05
RHOX6	2060	1946	0.990552	0.00986132	1	0.0356635
RIOK2	0	0	1	1	1	1
RNASEH2C	109	90	0.344122	0.681597	1	0.967218
RNF138	0	0	1	1	1	1
RPL35	0	0	1	1	1	1
RPL6	205	222	0.985458	0.0164258	1	0.0542604
RPP25	466	505	0.999498	0.000562338	1	0.00402829
RPS10	0	0	1	1	1	1
RPS4X	130	154	0.994525	0.00647898	1	0.0257576
RPS6KA5	0	0	1	1	1	1
RREB1	0	0	1	1	1	1
RUFY3	0	0	1	1	1	1
RUNX1	459	495	0.999288	0.000796632	1	0.00525213
RUNX2	93	109	0.981443	0.0219997	1	0.0694482
RUVBL1	54	48	0.54318	0.496256	1	0.756055
RXRA	93	86	0.647004	0.381151	1	0.614626
RXRA	180	177	0.862497	0.14949	1	0.308899
RXRA	2680	2570	0.999418	0.000611148	1	0.00429533
SCMH1	0	0	1	1	1	1
SEMA4A	417	392	0.836247	0.172609	1	0.343262
SF1	0	0	1	1	1	1
SF3B1	0	0	1	1	1	1
SFPI1	1357	1374	0.999913	9.39036e-05	1	0.000920502
SFT2D1	556	548	0.972882	0.029063	1	0.0873062
SHOX2	2490	2368	0.997648	0.00246062	1	0.0127303
SIX1	2014	2004	0.999971	3.15256e-05	1	0.000366978
SIX2	2650	2520	0.998227	0.00185469	1	0.0101599
SIX3	2817	2669	0.997936	0.00215523	1	0.0113875
SIX4	2450	2382	0.999839	0.000169881	1	0.00147165
SIX6	2698	2548	0.996365	0.00379021	1	0.0182175
SIX6	2756	2624	0.998743	0.0013157	1	0.00790482
SIX6	2875	2751	0.999485	0.000540282	1	0.0039201
SLC18A1	275	242	0.515221	0.502347	1	0.762217
SMAD2	0	0	1	1	1	1
SMAD3	101	93	0.640822	0.38636	1	0.621681
SMAD3	2288	2487	1	4.05462e-14	1	6.04139e-12
SMAD4	235	246	0.974024	0.0288568	1	0.0870376
SMUG1	16	12	0.373781	0.695177	1	0.984614
SNAPC4	113	113	0.842349	0.174227	1	0.34521
SND1	30	33	0.829883	0.20401	1	0.391721
SNRPB2	0	0	1	1	1	1
SOCS4	53	49	0.61976	0.418495	1	0.663236
SOD1	0	0	1	1	1	1
SOX1	1631	1595	0.999009	0.0010521	1	0.00669924
SOX10	364	362	0.954074	0.0496238	1	0.137434
SOX11	1038	977	0.942794	0.059823	1	0.157485
SOX12	946	973	0.999757	0.000264678	1	0.00219095
SOX13	0	0	1	1	1	1
SOX13	1175	1118	0.973986	0.027311	1	0.0832078
SOX15	1826	1722	0.98445	0.016225	1	0.0542047
SOX17	373	432	0.999959	4.71553e-05	1	0.000501868
SOX17	960	921	0.973663	0.0277852	1	0.0841463
SOX18	1526	1463	0.992422	0.00797275	1	0.03046
SOX2	47	60	0.975965	0.0300761	1	0.0896267
SOX21	394	316	0.118865	0.888443	1	1
SOX3	48	53	0.884557	0.136036	1	0.287102
SOX30	2111	2016	0.996873	0.00328017	1	0.0162915
SOX4	1134	1124	0.99814	0.00198952	1	0.0106633
SOX4	937	904	0.979421	0.0217701	1	0.0690157
SOX5	113	120	0.930229	0.0789839	1	0.189206
SOX5	1109	1111	0.999136	0.000929067	1	0.00601874
SOX6	67	61	0.596674	0.437903	1	0.685247
SOX7	1312	1291	0.9984	0.00170497	1	0.0095122
SOX8	1118	1032	0.880344	0.124045	1	0.268644
SOX9	1098	1154	0.999991	1.00054e-05	1	0.000135528
SP1	20	16	0.421983	0.641837	1	0.924891
SP100	1223	1107	0.771139	0.235226	1	0.438109
SP2	45	26	0.0497876	0.961225	1	1
SP4	23114	158	0	1	0	1
SPAG7	9	4	0.152774	0.903161	1	1
SPATS2	0	0	1	1	1	1
SPDEF	2900	2802	0.999881	0.000125708	1	0.0011421
SPIB	284	300	0.987657	0.0137325	1	0.0475849
SPR	0	0	1	1	1	1
SPZ1	403	396	0.945547	0.0584794	1	0.155043
SRBD1	55	62	0.918177	0.0967682	1	0.221142
SREBF1	6	5	0.524448	0.596674	1	0.866515
SREBF2	108	116	0.937836	0.0707808	1	0.174608
SRF	1962	1914	0.999556	0.000470752	1	0.00354584
SRF	3493	3308	0.999249	0.000783504	1	0.0052117
SRP9	12	10	0.492272	0.592536	1	0.862187
SSBP3	20	24	0.865942	0.169502	1	0.340375
STAT1	2362	2398	1	2.20543e-07	1	5.07764e-06
STAT3	1632	1653	0.999981	2.00695e-05	1	0.000241158
STAT4	1553	1566	0.999952	5.19423e-05	1	0.000537459
STAT6	1395	1419	0.999959	4.46278e-05	1	0.000484818
STAU2	45	45	0.747238	0.28766	1	0.500022
STUB1	0	0	1	1	1	1
SUCLG1	247	221	0.586559	0.431556	1	0.679724
T	59	56	0.677337	0.356847	1	0.579197
TAF9	0	0	1	1	1	1
TAGLN2	0	0	1	1	1	1
TBP	2312	2072	0.754419	0.250422	1	0.457266
TBP	311	333	0.994448	0.00621051	1	0.0252832
TBPL1	25	29	0.861661	0.170725	1	0.34191
TCEAL6	0	0	1	1	1	1
TCF12	138	148	0.95699	0.0487	1	0.13659
TCF3	92	95	0.872801	0.143085	1	0.29776
TCF3	122	125	0.89264	0.119594	1	0.261283
TCF3	2519	2397	0.997915	0.00218226	1	0.0114492
TCF7	2221	2074	0.979788	0.0209787	1	0.0670777
TCFAP2A	2129	1687	0.000751349	0.99929	0.0329267	1
TCFAP2B	1599	1327	0.0636871	0.938607	1	1
TCFAP2C	2180	1797	0.0229456	0.977913	0.777022	1
TCFAP2E	1606	1304	0.0175762	0.983219	0.623537	1
TCFCP2L1	2805	2699	0.999714	0.000300368	1	0.00243233
TEAD1	59	64	0.887456	0.130781	1	0.279976
TEAD1	21	24	0.830533	0.209905	1	0.400972
TFAM	0	0	1	1	1	1
TFAP2A	36	31	0.491333	0.557213	1	0.822027
TFAP2A	315	291	0.740221	0.273144	1	0.482836
TGIF1	67	45	0.088722	0.925478	1	1
TGIF1	4561	4707	1	7.02092e-16	1	1.74353e-13
TGIF2	4166	4254	1	6.80125e-13	1	8.44489e-11
THAP1	1679	1532	0.861501	0.142474	1	0.29732
THRA	0	0	1	1	1	1
TIA1	0	0	1	1	1	1
TIMELESS	0	0	1	1	1	1
TIMM44	0	0	1	1	1	1
TITF1	2734	2745	1	2.45202e-07	1	5.1255e-06
TLX2	404	412	0.984578	0.0168355	1	0.0552529
TOB2	0	0	1	1	1	1
TP63	1466	1538	1	4.38418e-07	1	8.5953e-06
TPI1	0	0	1	1	1	1
TPPP	164	157	0.786709	0.229897	1	0.431418
TRIM21	255	204	0.164355	0.846954	1	1
TRIM69	0	0	1	1	1	1
TRIP10	156	154	0.853799	0.159621	1	0.324025
TRMT1	0	0	1	1	1	1
TROVE2	0	0	1	1	1	1
TSC22D4	123	90	0.0993752	0.912081	1	1
TSN	303	281	0.74927	0.264104	1	0.475563
TSNAX	0	0	1	1	1	1
TULP1	67	58	0.484175	0.551378	1	0.815033
U2AF1	0	0	1	1	1	1
UBB	0	0	1	1	1	1
UBE2V1	474	462	0.945687	0.058019	1	0.154372
UGP2	0	0	1	1	1	1
UNCX4.1	1820	1650	0.831568	0.172783	1	0.343262
UQCRB	52	31	0.0483622	0.961659	1	1
USF1	0	0	1	1	1	1
USF1	321	319	0.943049	0.0616231	1	0.159962
USF2	58	66	0.930993	0.0817877	1	0.19405
USF2	143	120	0.36762	0.655375	1	0.938951
USP39	239	203	0.369887	0.647945	1	0.930095
UTP18	178	190	0.97068	0.03298	1	0.0973876
VAMP3	83	86	0.866534	0.150788	1	0.309469
VAX1	2836	2670	0.995743	0.00443153	1	0.020141
VAX2	451	463	0.991195	0.00962787	1	0.0349891
VAX2	2760	2646	0.999487	0.000538566	1	0.0039201
VPS4B	0	0	1	1	1	1
VSX1	3	5	0.860804	0.234185	1	0.437263
VSX1	1711	1627	0.990156	0.0103129	1	0.0367614
WISP2	0	0	1	1	1	1
XRCC1	196	194	0.885093	0.125043	1	0.270021
YEATS4	0	0	1	1	1	1
YWHAE	4	2	0.318779	0.811593	1	1
YWHAZ	0	0	1	1	1	1
YY1	731	701	0.953345	0.049303	1	0.137434
ZBTB12	57	56	0.738634	0.292905	1	0.505125
ZBTB12	2760	2747	0.999999	1.19546e-06	1	1.97915e-05
ZBTB25	0	0	1	1	1	1
ZBTB3	2973	2959	1	4.72815e-07	1	9.03198e-06
ZBTB33	271	209	0.0826737	0.924074	1	1
ZBTB4	181	183	0.913821	0.0947275	1	0.219168
ZBTB43	0	0	1	1	1	1
ZBTB46	174	156	0.582878	0.438742	1	0.685247
ZBTB7B	728	286	1.30313e-32	1	1.61806e-30	1
ZC3H7A	87	86	0.791729	0.230753	1	0.431937
ZCCHC14	0	0	1	1	1	1
ZCCHC17	0	0	1	1	1	1
ZDHHC15	461	498	0.999362	0.00071373	1	0.00496943
ZDHHC5	0	0	1	1	1	1
ZEB1	21	23	0.789653	0.256532	1	0.467278
ZFP105	472	354	0.012915	0.988202	0.481082	1
ZFP128	2149	2053	0.997228	0.00290758	1	0.0147357
ZFP161	693	466	4.14179e-06	0.999996	0.000205709	1
ZFP187	1703	1691	0.999851	0.000159381	1	0.00140553
ZFP281	22918	27	0	1	0	1
ZFP3	408	406	0.96362	0.0392721	1	0.113402
ZFP410	1117	1096	0.995837	0.00443372	1	0.020141
ZFP423	10	11	0.734945	0.341766	1	0.564296
ZFP691	3201	3287	1	6.8718e-11	1	4.26624e-09
ZFP740	23588	84	0	1	0	1
ZFX	413	287	0.00120661	0.998936	0.0499403	1
ZHX3	373	358	0.887787	0.119443	1	0.261283
ZIC1	436	137	3.86443e-28	1	4.11286e-26	1
ZIC2	622	249	3.51403e-27	1	2.61796e-25	1
ZIC3	593	228	6.55448e-28	1	6.10386e-26	1
ZMAT2	0	0	1	1	1	1
ZMAT4	0	0	1	1	1	1
ZRSR2	0	0	1	1	1	1
ZSWIM1	55	53	0.700493	0.333793	1	0.557569

## Sheet: Ancestral bat vs mouse per BAR
BAR	Transcription Factor	# TFBS in Ancestral bat	# TFBS in M. musculus (mm10)	P-value for TFBS gain in ancestral bat	P-value for TFBS loss in ancestral bat	FDR for TFBS gain in ancestral bat	FDR for TFBS loss in ancestral bat
1	ABCF2	1	2	0.955127	0.23883	1	1
1	ACO1	0	0	1	1	1	1
1	ADARB1	0	0	0.76761	0.754259	1	1
1	AFF4	0	0	1	1	1	1
1	AGGF1	0	0	1	1	1	1
1	ALX3	2	2	0.593853	0.536143	1	1
1	ALX4	2	1	0.46733	0.65457	1	1
1	ANXA1	0	0	0.957823	0.955791	1	1
1	ANXA11	0	0	1	1	1	1
1	APEX2	1	0	0.286035	0.930644	1	1
1	AR	0	1	0.876559	0.3337	1	1
1	ARFGAP1	0	0	0.812222	0.802058	1	1
1	ARID3A	0	0	1	1	1	1
1	ARID3A	1	3	0.840394	0.265861	1	1
1	ARID5A	0	2	0.868173	0.242849	1	1
1	ARNT	0	0	1	1	1	1
1	ARNTL	0	0	0.839243	0.830745	1	1
1	ARX	3	3	0.595184	0.5395	1	1
1	ASCC1	0	0	1	1	1	1
1	ASCL2	16	18	0.760167	0.321381	1	1
1	ASPSCR1	0	0	0.854272	0.846703	1	1
1	ATF1	6	11	0.944992	0.0924119	1	1
1	ATOH1	0	0	0.925987	0.922341	1	1
1	BARHL1	1	1	0.601901	0.553907	1	1
1	BARHL2	1	1	0.636724	0.605763	1	1
1	BARX1	0	0	1	1	1	1
1	BARX1	5	4	0.471024	0.646489	1	1
1	BARX2	2	2	0.602317	0.554691	1	1
1	BAX	0	0	1	1	1	1
1	BBX	7	2	0.0668017	0.966912	1	1
1	BCL11A	0	0	1	1	1	1
1	BCL6	4	5	0.718015	0.405251	1	1
1	BCL6B	8	5	0.297141	0.783179	1	1
1	BOLL	0	0	1	1	1	1
1	BRCA1	0	0	0.85725	0.849856	1	1
1	BSX	8	7	0.480588	0.626097	1	1
1	CANX	0	0	1	1	1	1
1	CAT	0	1	0.939929	0.265615	1	1
1	CBFA2T2	0	1	0.978337	0.178676	1	1
1	CBFB	2	1	0.428462	0.738971	1	1
1	CBX3	0	0	0.936693	0.933603	1	1
1	CBX7	0	0	1	1	1	1
1	CCDC25	1	0	0.261311	0.945821	1	1
1	CDX1	1	0	0.448899	0.695008	1	1
1	CDX2	0	0	0.96077	0.958868	1	1
1	CDX2	1	1	0.598904	0.547979	1	1
1	CEBPA	1	1	0.813801	0.803659	1	1
1	CEBPB	1	0	0.245791	0.953887	1	1
1	CEBPG	1	0	0.298147	0.921954	1	1
1	CFL2	0	0	1	1	1	1
1	CLK1	0	0	1	1	1	1
1	CNOT6	0	0	0.897612	0.892468	1	1
1	CPHX	0	0	0.589831	0.52449	1	1
1	CPSF4	0	0	1	1	1	1
1	CREB1	0	0	1	1	1	1
1	CREB1	3	1	0.071483	0.987428	1	1
1	CREB3L1	0	0	1	1	1	1
1	CRX	0	0	0.850751	0.842914	1	1
1	CRX	2	1	0.466708	0.655848	1	1
1	CSNK2B	0	0	1	1	1	1
1	CSTF2	0	0	1	1	1	1
1	CTCF	3	6	0.923238	0.148487	1	1
1	CUTL1	4	5	0.683816	0.412152	1	1
1	CUTL1	1	2	0.730913	0.401627	1	1
1	CYB5R1	0	0	0.993765	0.99347	1	1
1	CYCS	0	0	1	1	1	1
1	DAB2	0	0	1	1	1	1
1	DAZAP1	0	0	1	1	1	1
1	DBX1	0	0	0.639085	0.60871	1	1
1	DBX2	1	1	0.612654	0.572206	1	1
1	DDX20	0	2	0.996457	0.0329942	1	1
1	DDX4	0	0	1	1	1	1
1	DGCR8	0	0	0.897503	0.892363	1	1
1	DHX36	0	0	0.882905	0.876956	1	1
1	DIABLO	1	0	0.238583	0.957283	1	1
1	DIS3	0	0	1	1	1	1
1	DLX1	0	1	0.733596	0.400873	1	1
1	DLX2	4	4	0.592232	0.531866	1	1
1	DLX3	3	3	0.591618	0.529765	1	1
1	DLX4	4	4	0.591158	0.528294	1	1
1	DLX5	3	6	0.848883	0.222699	1	1
1	DLX6	0	0	1	1	1	1
1	DMBX1	1	2	0.723034	0.403781	1	1
1	DNMT3A	0	0	1	1	1	1
1	DTL	0	0	0.944493	0.941792	1	1
1	DUS3L	0	0	1	1	1	1
1	DUSP22	0	0	1	1	1	1
1	DUSP26	0	0	1	1	1	1
1	E2F1	0	0	0.997916	0.997817	1	1
1	E2F2	5	0	0.00513507	0.998888	1	1
1	E2F3	0	0	0.974061	0.972804	1	1
1	E2F3	5	0	0.00737602	0.998224	1	1
1	E2F4	0	0	0.991745	0.991352	1	1
1	E2F6	0	0	0.990728	0.990286	1	1
1	EBF1	0	0	1	1	1	1
1	EBF1	0	1	0.928825	0.281594	1	1
1	ECSIT	0	0	1	1	1	1
1	EDN1	0	0	0.869252	0.862521	1	1
1	EEF1D	0	0	0.906559	0.901886	1	1
1	EGR1	0	0	0.899716	0.894625	1	1
1	EGR1	0	0	0.792524	0.780874	1	1
1	EGR2	0	0	0.809845	0.79936	1	1
1	EHF	1	0	0.0591216	0.998109	1	1
1	EHF	0	4	0.940917	0.108267	1	1
1	EIF5A2	1	0	0.0860707	0.995828	1	1
1	ELF1	0	0	0.950951	0.94855	1	1
1	ELF2	0	0	1	1	1	1
1	ELF3	0	1	0.750221	0.395681	1	1
1	ELF5	0	0	0.649223	0.621801	1	1
1	ELK1	0	1	0.961975	0.224198	1	1
1	ELK4	0	0	0.82	0.810261	1	1
1	EMX2	4	2	0.372732	0.725294	1	1
1	EN1	4	4	0.612737	0.572832	1	1
1	EN1	1	1	0.597706	0.545443	1	1
1	EN2	4	3	0.468209	0.652659	1	1
1	ENO1	0	0	1	1	1	1
1	EOMES	4	4	0.596219	0.541954	1	1
1	ERG	0	0	0.909021	0.904461	1	1
1	ESR2	13	14	0.681602	0.412549	1	1
1	ESRRA	0	0	0.946177	0.943566	1	1
1	ESRRA	4	0	0.0408913	0.986356	1	1
1	ESRRA	12	11	0.48791	0.610985	1	1
1	ESRRB	16	8	0.0295638	0.983994	1	1
1	ESX1	0	0	1	1	1	1
1	ESX1	3	3	0.604065	0.557775	1	1
1	ETFB	0	0	1	1	1	1
1	ETS1	0	0	1	1	1	1
1	ETS1	0	0	0.8103	0.799845	1	1
1	ETV4	0	0	1	1	1	1
1	EVX1	0	0	1	1	1	1
1	EVX1	4	2	0.363458	0.737836	1	1
1	EVX2	8	3	0.135716	0.913301	1	1
1	EWSR1	0	0	0.931736	0.928386	1	1
1	FEV	0	0	0.867853	0.861056	1	1
1	FEZ1	0	0	1	1	1	1
1	FEZF2	0	0	0.901888	0.896983	1	1
1	FHL2	0	0	0.950658	0.948265	1	1
1	FIP1L1	2	1	0.285773	0.930822	1	1
1	FLI1	0	0	0.978671	0.977656	1	1
1	FLI1	0	0	0.920631	0.916684	1	1
1	FOS	0	0	0.763637	0.749924	1	1
1	FOSL1	1	0	0.120051	0.991431	1	1
1	FOSL1	1	1	0.761698	0.747832	1	1
1	FOSL2	0	1	0.906887	0.307186	1	1
1	FOXA1	0	1	0.906434	0.30761	1	1
1	FOXA2	0	1	0.908179	0.305847	1	1
1	FOXA2	0	2	0.903769	0.208697	1	1
1	FOXC1	0	0	0.732819	0.716607	1	1
1	FOXD1	0	0	0.973835	0.972583	1	1
1	FOXD3	0	0	0.836996	0.828309	1	1
1	FOXF2	0	0	0.972119	0.970768	1	1
1	FOXH1	0	0	0.966339	0.964712	1	1
1	FOXI1	0	0	0.888173	0.88247	1	1
1	FOXJ1	1	2	0.797532	0.377848	1	1
1	FOXJ3	1	2	0.800373	0.37661	1	1
1	FOXK1	0	1	0.80871	0.37293	1	1
1	FOXL1	0	2	0.984613	0.0789447	1	1
1	FOXL1	0	1	0.843959	0.355029	1	1
1	FOXM1	2	2	0.743914	0.72874	1	1
1	FOXN3	0	0	0.870265	0.863619	1	1
1	FOXO1	0	0	0.799075	0.787949	1	1
1	FOXP1	0	0	0.871314	0.864622	1	1
1	FOXP2	0	0	0.895073	0.88976	1	1
1	FOXP4	0	0	0.987682	0.987095	1	1
1	FOXQ1	0	0	0.886677	0.880902	1	1
1	GABPA	0	0	0.763964	0.750276	1	1
1	GABPA	3	7	0.946005	0.101869	1	1
1	GADD45A	0	0	1	1	1	1
1	GATA1	0	0	0.940382	0.937456	1	1
1	GATA2	0	0	0.816641	0.806625	1	1
1	GATA3	0	0	1	1	1	1
1	GATA4	0	0	0.895787	0.890512	1	1
1	GATA5	1	3	0.857877	0.251648	1	1
1	GATA6	2	2	0.601345	0.552706	1	1
1	GBX1	2	2	0.59577	0.540904	1	1
1	GBX2	5	3	0.368885	0.730513	1	1
1	GCM1	2	2	0.605708	0.560808	1	1
1	GFI1	1	0	0.315353	0.907972	1	1
1	GFI1B	1	2	0.855765	0.348044	1	1
1	GIT2	0	0	0.819208	0.809514	1	1
1	GLIS2	1	1	0.628676	0.595206	1	1
1	GM397	19	14	0.182751	0.870449	1	1
1	GMEB1	11	7	0.0758777	0.96703	1	1
1	GOT1	0	0	1	1	1	1
1	GPAM	0	0	1	1	1	1
1	GPD1	0	0	1	1	1	1
1	GRHL1	0	0	0.947999	0.945474	1	1
1	GRHPR	0	0	1	1	1	1
1	GSC	1	1	0.596663	0.542969	1	1
1	GTF2B	0	0	0.825662	0.816376	1	1
1	GTF2H3	0	0	1	1	1	1
1	GTF3C2	0	0	1	1	1	1
1	GTPBP1	0	0	1	1	1	1
1	GTPBP6	0	0	0.746025	0.730999	1	1
1	H1FX	0	0	0.878086	0.871881	1	1
1	H2AFY	0	0	0.704374	0.685286	1	1
1	H2AFZ	0	0	0.915828	0.911637	1	1
1	HBP1	4	2	0.328384	0.783803	1	1
1	HCFC2	0	1	0.97573	0.187311	1	1
1	HCLS1	1	0	0.0403006	0.999144	1	1
1	HDAC8	0	0	1	1	1	1
1	HDX	5	2	0.249451	0.8355	1	1
1	HES5	0	0	0.942624	0.939839	1	1
1	HHAT	0	0	1	1	1	1
1	HHEX	0	0	0.723555	0.706513	1	1
1	HIC1	7	5	0.332601	0.778418	1	1
1	HIST1H2BN	0	1	0.999619	0.027095	1	1
1	HIST2H2AB	0	1	0.879256	0.331749	1	1
1	HIST2H2BE	0	0	0.877799	0.871541	1	1
1	HLCS	0	0	1	1	1	1
1	HLF	2	1	0.401444	0.793787	1	1
1	HLTF	1	2	0.914816	0.298713	1	1
1	HMBOX1	3	5	0.800363	0.295356	1	1
1	HMG20A	0	0	1	1	1	1
1	HMX1	4	3	0.467465	0.654276	1	1
1	HMX2	3	3	0.601131	0.552292	1	1
1	HMX3	3	3	0.601931	0.553828	1	1
1	HNF1A	0	0	0.661242	0.635914	1	1
1	HNF1B	0	0	0.974926	0.973718	1	1
1	HNF4A	7	7	0.588056	0.516077	1	1
1	HNF4A	12	8	0.185218	0.879672	1	1
1	HNF4G	5	7	0.773765	0.313031	1	1
1	HNRNPA1	1	1	0.711886	0.693606	1	1
1	HNRNPC	1	0	0.174673	0.980004	1	1
1	HOMEZ	5	3	0.294642	0.825128	1	1
1	HOXA1	0	3	0.89005	0.184212	1	1
1	HOXA10	0	0	0.61451	0.575063	1	1
1	HOXA11	2	2	0.596065	0.541774	1	1
1	HOXA13	4	4	0.592203	0.531781	1	1
1	HOXA2	3	6	0.873244	0.200544	1	1
1	HOXA3	3	2	0.465871	0.657527	1	1
1	HOXA3	0	0	0.592632	0.533465	1	1
1	HOXA4	1	0	0.442892	0.708297	1	1
1	HOXA5	2	2	0.628878	0.596076	1	1
1	HOXA5	3	4	0.707099	0.407871	1	1
1	HOXA6	2	4	0.824128	0.278332	1	1
1	HOXA7	2	1	0.467551	0.654088	1	1
1	HOXA7	1	2	0.707304	0.407823	1	1
1	HOXA9	0	0	0.721366	0.703973	1	1
1	HOXA9	0	0	0.601238	0.552499	1	1
1	HOXB13	0	0	0.976829	0.975717	1	1
1	HOXB13	0	0	0.630805	0.598046	1	1
1	HOXB3	4	7	0.855368	0.216942	1	1
1	HOXB4	1	0	0.451404	0.689546	1	1
1	HOXB5	1	3	0.808801	0.289473	1	1
1	HOXB6	4	5	0.706073	0.408107	1	1
1	HOXB7	0	1	0.727602	0.402544	1	1
1	HOXB8	4	5	0.732668	0.401075	1	1
1	HOXB9	0	0	1	1	1	1
1	HOXB9	0	0	0.607578	0.564007	1	1
1	HOXC10	2	3	0.707663	0.407739	1	1
1	HOXC11	3	3	0.596198	0.542079	1	1
1	HOXC12	3	4	0.706147	0.408043	1	1
1	HOXC13	2	2	0.595446	0.540317	1	1
1	HOXC4	3	1	0.300179	0.818589	1	1
1	HOXC5	2	2	0.599549	0.54915	1	1
1	HOXC6	0	1	0.749057	0.395935	1	1
1	HOXC8	1	2	0.737386	0.399659	1	1
1	HOXC9	0	0	0.636792	0.606056	1	1
1	HOXC9	4	5	0.703666	0.408648	1	1
1	HOXD1	4	3	0.476261	0.635333	1	1
1	HOXD10	0	0	0.621669	0.585468	1	1
1	HOXD11	2	2	0.59282	0.533333	1	1
1	HOXD12	3	4	0.706347	0.407997	1	1
1	HOXD13	1	1	0.623723	0.588437	1	1
1	HOXD3	0	0	0.891782	0.886332	1	1
1	HOXD3	4	7	0.871145	0.20252	1	1
1	HOXD8	2	3	0.807767	0.373355	1	1
1	HP1BP3	0	0	0.878086	0.871881	1	1
1	HSF1	1	1	0.636294	0.605822	1	1
1	HSF1	2	0	0.318307	0.796465	1	1
1	HSPA1L	0	0	1	1	1	1
1	HSPA5	0	0	0.994789	0.994543	1	1
1	ID2	0	0	1	1	1	1
1	ING3	0	1	0.944327	0.258531	1	1
1	INSM1	1	0	0.23881	0.957181	1	1
1	INSM1	0	0	0.806204	0.795538	1	1
1	IRF1	0	0	1	1	1	1
1	IRF2	0	0	0.982863	0.982031	1	1
1	IRF3	2	0	0.211509	0.909348	1	1
1	IRF4	4	4	0.602048	0.554319	1	1
1	IRF5	0	1	0.771581	0.38815	1	1
1	IRF6	0	0	0.811757	0.801563	1	1
1	IRF6	4	3	0.446631	0.700072	1	1
1	IRX2	8	6	0.324261	0.789048	1	1
1	IRX3	8	6	0.339093	0.770067	1	1
1	IRX3	7	7	0.595575	0.540442	1	1
1	IRX4	5	6	0.730804	0.401584	1	1
1	IRX5	8	7	0.462165	0.665851	1	1
1	IRX6	7	6	0.451807	0.688657	1	1
1	ISGF3G	0	1	0.798996	0.377248	1	1
1	ISL2	1	1	0.614546	0.575118	1	1
1	ISX	3	3	0.588556	0.518314	1	1
1	IVD	0	0	1	1	1	1
1	JUN	0	1	0.931709	0.277658	1	1
1	JUNB	0	0	0.786847	0.774866	1	1
1	JUNDM2	4	10	0.96747	0.0572626	1	1
1	KCNIP1	1	0	0.255291	0.949092	1	1
1	KIF22	0	0	1	1	1	1
1	KLF1	0	0	0.957116	0.955033	1	1
1	KLF3	0	0	0.762957	0.749301	1	1
1	KLF4	0	0	1	1	1	1
1	KLF4	0	0	0.902942	0.898065	1	1
1	KLF5	0	0	0.937758	0.934704	1	1
1	KLF7	0	0	0.689697	0.668572	1	1
1	LARP1	0	0	0.863478	0.856431	1	1
1	LARP4	2	0	0.153525	0.950964	1	1
1	LAS1L	0	0	1	1	1	1
1	LBX2	4	3	0.469216	0.650474	1	1
1	LEF1	3	4	0.708615	0.40747	1	1
1	LHX1	2	1	0.410905	0.77578	1	1
1	LHX2	0	0	1	1	1	1
1	LHX2	1	1	0.594291	0.537277	1	1
1	LHX3	0	0	0.981768	0.980891	1	1
1	LHX3	0	1	0.829288	0.362999	1	1
1	LHX4	0	0	1	1	1	1
1	LHX4	2	1	0.469391	0.650095	1	1
1	LHX5	0	1	0.804607	0.374763	1	1
1	LHX6	3	1	0.341291	0.767209	1	1
1	LHX6	7	5	0.373071	0.724834	1	1
1	LHX8	8	3	0.144327	0.905767	1	1
1	LHX9	1	1	0.598093	0.546116	1	1
1	LMX1A	2	2	0.623604	0.588188	1	1
1	LMX1B	0	0	0.647913	0.619721	1	1
1	LSM6	0	0	1	1	1	1
1	MAFB	5	6	0.801256	0.376433	1	1
1	MAFB	8	8	0.587094	0.5067	1	1
1	MAFF	3	6	0.891902	0.182329	1	1
1	MAFK	1	2	0.8287	0.36334	1	1
1	MAFK	7	8	0.686821	0.411862	1	1
1	MAGEA8	0	0	0.878086	0.871881	1	1
1	MAGOH	0	0	0.897831	0.892679	1	1
1	MAP4K2	0	1	0.956333	0.236389	1	1
1	MAPK1	0	0	1	1	1	1
1	MAX	0	0	0.902942	0.898065	1	1
1	MAX	6	10	0.926829	0.125047	1	1
1	MBTPS2	0	0	0.907209	0.90258	1	1
1	MCTP2	0	0	1	1	1	1
1	MDM2	0	0	0.921957	0.918103	1	1
1	MECP2	0	0	1	1	1	1
1	MEF2A	1	1	0.68696	0.665525	1	1
1	MEF2C	1	1	0.684863	0.663148	1	1
1	MEIS1	4	2	0.159935	0.947069	1	1
1	MEIS1	13	6	0.0779091	0.950577	1	1
1	MEOX1	4	6	0.784519	0.306058	1	1
1	MEX3C	0	0	0.891192	0.885699	1	1
1	MLX	0	0	0.928435	0.924916	1	1
1	MORN1	0	0	1	1	1	1
1	MRG2	14	6	0.0477771	0.971202	1	1
1	MRPL1	1	0	0.325096	0.899035	1	1
1	MRPL2	0	0	0.850464	0.84264	1	1
1	MRPS25	0	0	0.782279	0.770018	1	1
1	MSI1	0	0	0.796977	0.785817	1	1
1	MSI2	0	0	1	1	1	1
1	MSRA	0	0	1	1	1	1
1	MSRB3	0	0	1	1	1	1
1	MSX1	0	0	0.607192	0.563355	1	1
1	MSX2	2	4	0.790457	0.302093	1	1
1	MSX3	1	1	0.619623	0.58263	1	1
1	MTF1	16	7	0.00834472	0.996229	1	1
1	MTHFD1	0	0	1	1	1	1
1	MXD4	0	0	0.785007	0.77299	1	1
1	MYB	0	0	0.769824	0.756615	1	1
1	MYB	12	7	0.102102	0.941098	1	1
1	MYBL1	12	8	0.169994	0.893708	1	1
1	MYC	0	0	0.812241	0.802018	1	1
1	MYCN	0	0	0.982645	0.981819	1	1
1	MYEF2	0	0	1	1	1	1
1	MYF6	1	1	0.680941	0.659097	1	1
1	MYF6	11	8	0.309033	0.769561	1	1
1	MYLK	0	0	1	1	1	1
1	MYOD1	0	0	0.877423	0.871181	1	1
1	MYOD1	1	1	0.720837	0.703321	1	1
1	MYOG	0	0	0.857807	0.850386	1	1
1	NANOS1	0	0	1	1	1	1
1	NAP1L1	0	0	1	1	1	1
1	NCALD	0	0	0.98562	0.984938	1	1
1	NCBP2	0	0	1	1	1	1
1	NELFB	0	0	0.941825	0.938995	1	1
1	NFATC2	0	0	0.736403	0.720545	1	1
1	NFATC3	0	0	1	1	1	1
1	NFATC4	0	0	1	1	1	1
1	NFE2L2	3	3	0.651969	0.624782	1	1
1	NFIB	0	0	1	1	1	1
1	NFIC	7	2	0.131064	0.917248	1	1
1	NFIL3	0	0	1	1	1	1
1	NFIL3	1	2	0.97622	0.185731	1	1
1	NFIX	0	0	1	1	1	1
1	NFKB1	2	0	0.252293	0.871446	1	1
1	NFYA	2	3	0.726166	0.402872	1	1
1	NFYB	0	0	0.922574	0.918698	1	1
1	NHLH1	4	0	0.0189912	0.995313	1	1
1	NKX1-2	5	4	0.472899	0.642526	1	1
1	NKX2-2	6	3	0.2887	0.792737	1	1
1	NKX2-3	0	0	0.669718	0.646177	1	1
1	NKX2-3	2	5	0.840154	0.230264	1	1
1	NKX2-4	4	3	0.463203	0.663505	1	1
1	NKX2-5	1	1	0.742174	0.72682	1	1
1	NKX2-5	3	3	0.589985	0.524461	1	1
1	NKX2-6	3	4	0.725322	0.403187	1	1
1	NKX2-9	6	2	0.188029	0.877028	1	1
1	NKX3-1	0	1	0.915326	0.298166	1	1
1	NKX3-1	3	2	0.478056	0.631521	1	1
1	NKX3-1	2	6	0.930973	0.120226	1	1
1	NKX3-2	2	4	0.986387	0.0735864	1	1
1	NKX6-1	1	0	0.443724	0.706468	1	1
1	NKX6-1	0	0	0.604359	0.55843	1	1
1	NKX6-3	1	0	0.438791	0.717277	1	1
1	NME1	0	0	0.900953	0.89595	1	1
1	NMI	0	1	0.898401	0.315501	1	1
1	NMRAL1	0	0	1	1	1	1
1	NNT	0	0	1	1	1	1
1	NOBOX	0	0	0.693405	0.673085	1	1
1	NONO	0	0	0.859059	0.85177	1	1
1	NR2C2	1	3	0.711023	0.342704	1	1
1	NR2E3	0	0	0.803612	0.792879	1	1
1	NR2F1	0	0	1	1	1	1
1	NR2F1	0	1	0.920737	0.291811	1	1
1	NR2F2	12	9	0.268903	0.814644	1	1
1	NR4A1	0	0	0.678995	0.656926	1	1
1	NR4A2	0	0	0.855458	0.847959	1	1
1	NR4A2	3	0	0.00642764	0.999342	1	1
1	NR5A2	5	4	0.433196	0.729321	1	1
1	NRF1	0	0	0.949064	0.946577	1	1
1	NRL	0	0	1	1	1	1
1	NUCB1	0	0	0.909381	0.904875	1	1
1	NUP107	1	1	0.738203	0.722504	1	1
1	NUP133	0	0	1	1	1	1
1	NXPH3	0	0	0.823306	0.813854	1	1
1	OBOX1	2	2	0.597743	0.545362	1	1
1	OBOX3	2	3	0.714877	0.405935	1	1
1	OBOX5	1	3	0.823067	0.279102	1	1
1	OBOX5	1	2	0.738794	0.399192	1	1
1	OBOX6	2	1	0.456712	0.677702	1	1
1	ODC1	0	0	1	1	1	1
1	OLIG1	0	0	0.828365	0.81923	1	1
1	OLIG3	0	0	0.701482	0.682109	1	1
1	OSR1	11	12	0.69217	0.410938	1	1
1	OSR2	12	13	0.689195	0.411437	1	1
1	OTP	1	0	0.44589	0.701703	1	1
1	OTUD4	0	0	1	1	1	1
1	OTX1	1	1	0.617933	0.580083	1	1
1	OTX2	1	1	0.595212	0.539569	1	1
1	P4HB	0	0	1	1	1	1
1	PAX2	15	10	0.117888	0.928344	1	1
1	PAX3	0	0	0.720347	0.702889	1	1
1	PAX4	0	2	0.811841	0.287285	1	1
1	PAX5	3	5	0.886391	0.22611	1	1
1	PAX6	3	3	0.625524	0.591085	1	1
1	PAX6	0	0	0.60901	0.566384	1	1
1	PAX7	0	0	0.593196	0.534378	1	1
1	PAXIP1	1	2	0.953357	0.242314	1	1
1	PBX1	0	0	0.976858	0.975745	1	1
1	PBX1	5	2	0.181837	0.90117	1	1
1	PCK2	1	0	0.0461731	0.998868	1	1
1	PDCD11	0	1	0.972759	0.196388	1	1
1	PDE6H	0	0	0.855597	0.848092	1	1
1	PDLIM5	0	0	1	1	1	1
1	PDS5A	0	0	0.900417	0.895434	1	1
1	PDX1	0	0	0.712379	0.69426	1	1
1	PGAM2	0	0	1	1	1	1
1	PHLDA2	0	0	1	1	1	1
1	PHOX2A	0	0	1	1	1	1
1	PHOX2A	2	2	0.59305	0.534194	1	1
1	PHOX2B	0	0	0.601622	0.553239	1	1
1	PHTF1	0	0	1	1	1	1
1	PICK1	1	1	0.728412	0.711862	1	1
1	PIK3C3	0	0	1	1	1	1
1	PIR	0	0	1	1	1	1
1	PITX1	0	0	0.813466	0.803403	1	1
1	PITX1	2	0	0.314232	0.801556	1	1
1	PITX2	1	1	0.598093	0.546116	1	1
1	PITX3	1	3	0.835437	0.269747	1	1
1	PKNOX1	14	4	0.0155986	0.991486	1	1
1	PKNOX2	0	0	1	1	1	1
1	PKNOX2	17	5	0.00489239	0.997519	1	1
1	PLAG1	0	0	0.987744	0.987155	1	1
1	PLAGL1	0	0	1	1	1	1
1	PLAGL1	4	0	0.0106557	0.997869	1	1
1	PLG	0	0	1	1	1	1
1	POLE3	1	0	0.22492	0.963208	1	1
1	POLI	0	0	1	1	1	1
1	POU1F1	0	0	0.629235	0.59588	1	1
1	POU2F1	0	1	0.810524	0.372126	1	1
1	POU2F2	2	2	0.696905	0.6768	1	1
1	POU2F2	7	5	0.347988	0.75841	1	1
1	POU2F3	2	2	0.600774	0.551738	1	1
1	POU3F1	0	0	0.639732	0.609531	1	1
1	POU3F2	0	0	0.729519	0.713039	1	1
1	POU3F2	0	0	0.612462	0.571805	1	1
1	POU3F3	2	3	0.735762	0.400115	1	1
1	POU3F4	0	0	0.640824	0.61091	1	1
1	POU4F3	0	0	1	1	1	1
1	POU4F3	0	0	0.613362	0.573304	1	1
1	POU6F1	2	1	0.471472	0.645598	1	1
1	POU6F1	1	1	0.59516	0.539443	1	1
1	PPP1R10	0	0	1	1	1	1
1	PPP5C	2	1	0.347395	0.87531	1	1
1	PQBP1	0	0	0.677866	0.655546	1	1
1	PRDM1	0	0	0.751383	0.736566	1	1
1	PRDX5	0	0	1	1	1	1
1	PRKRIR	0	0	0.973835	0.972583	1	1
1	PRNP	0	0	1	1	1	1
1	PROP1	0	0	0.623738	0.588375	1	1
1	PRRX1	0	0	0.85725	0.849856	1	1
1	PRRX1	0	0	0.599398	0.548843	1	1
1	PRRX2	0	0	1	1	1	1
1	PRRX2	3	1	0.335491	0.774726	1	1
1	PSMA6	0	0	0.766597	0.753222	1	1
1	PSMC2	0	0	0.773819	0.760833	1	1
1	PTCD1	0	0	0.836391	0.827735	1	1
1	PTPMT1	0	0	1	1	1	1
1	PURG	0	0	0.899793	0.894766	1	1
1	R3HDM2	0	0	1	1	1	1
1	RAB14	0	0	0.982623	0.981798	1	1
1	RAB18	0	0	1	1	1	1
1	RAN	0	0	0.954243	0.952029	1	1
1	RARA	0	0	1	1	1	1
1	RARA	12	12	0.58749	0.511734	1	1
1	RARB	0	0	1	1	1	1
1	RARG	0	0	1	1	1	1
1	RAX	0	0	0.86709	0.860263	1	1
1	RAX	2	2	0.595104	0.539305	1	1
1	RBBP5	0	0	1	1	1	1
1	RBBP9	0	0	1	1	1	1
1	RBM17	0	0	1	1	1	1
1	RBM22	0	0	0.734219	0.718102	1	1
1	RBM3	0	0	1	1	1	1
1	RBM7	0	0	1	1	1	1
1	RBM8A	0	0	0.719065	0.701621	1	1
1	RBMS1	0	0	1	1	1	1
1	REL	1	1	0.662316	0.637392	1	1
1	RELA	0	0	0.76217	0.74837	1	1
1	RFC2	0	0	1	1	1	1
1	RFX1	2	0	0.150443	0.952804	1	1
1	RFX2	9	4	0.0611013	0.970689	1	1
1	RFX3	0	0	0.982666	0.98184	1	1
1	RFX4	0	0	1	1	1	1
1	RFX4	7	3	0.128904	0.928878	1	1
1	RFX5	2	1	0.385454	0.82205	1	1
1	RFXANK	0	0	0.947938	0.945414	1	1
1	RFXDC2	7	6	0.455244	0.680937	1	1
1	RHOX11	4	2	0.391552	0.699507	1	1
1	RHOX11	6	3	0.300319	0.779578	1	1
1	RHOX6	1	1	0.596504	0.542607	1	1
1	RIOK2	0	0	1	1	1	1
1	RNASEH2C	1	0	0.163077	0.982948	1	1
1	RNF138	0	0	1	1	1	1
1	RPL35	0	0	1	1	1	1
1	RPL6	0	0	0.751023	0.736442	1	1
1	RPP25	2	0	0.14302	0.957029	1	1
1	RPS10	0	0	1	1	1	1
1	RPS4X	1	0	0.207905	0.969709	1	1
1	RPS6KA5	0	0	1	1	1	1
1	RUFY3	0	0	1	1	1	1
1	RUNX1	0	1	0.87436	0.33539	1	1
1	RUNX2	0	0	0.84454	0.836264	1	1
1	RUVBL1	0	0	0.909122	0.904557	1	1
1	RXRA	0	0	0.856512	0.849089	1	1
1	RXRA	0	0	0.77454	0.76166	1	1
1	RXRA	10	11	0.70435	0.408448	1	1
1	SCMH1	0	0	1	1	1	1
1	SEMA4A	1	2	0.892528	0.320805	1	1
1	SF1	0	0	1	1	1	1
1	SF3B1	0	0	1	1	1	1
1	SFPI1	1	1	0.606694	0.56274	1	1
1	SFT2D1	1	1	0.652489	0.625868	1	1
1	SHOX2	1	2	0.709673	0.407218	1	1
1	SIX1	0	1	0.723833	0.403561	1	1
1	SIX2	1	2	0.705382	0.408217	1	1
1	SIX3	2	1	0.472494	0.643397	1	1
1	SIX4	8	8	0.592873	0.53348	1	1
1	SIX6	3	2	0.470405	0.647901	1	1
1	SIX6	2	1	0.471585	0.645354	1	1
1	SIX6	4	1	0.256338	0.828207	1	1
1	SLC18A1	0	0	0.727642	0.710987	1	1
1	SMAD2	0	0	1	1	1	1
1	SMAD3	0	0	0.847876	0.83993	1	1
1	SMAD3	2	4	0.809283	0.289109	1	1
1	SMAD4	1	1	0.736569	0.720694	1	1
1	SMUG1	0	0	0.971877	0.970533	1	1
1	SNAPC4	0	1	0.980869	0.169569	1	1
1	SND1	0	0	0.940173	0.937253	1	1
1	SNRPB2	0	0	1	1	1	1
1	SOCS4	0	0	0.908721	0.904171	1	1
1	SOD1	0	0	1	1	1	1
1	SOX1	4	2	0.299241	0.819685	1	1
1	SOX10	0	0	0.689483	0.668762	1	1
1	SOX11	1	0	0.418975	0.759487	1	1
1	SOX12	0	0	0.620488	0.584046	1	1
1	SOX13	0	0	1	1	1	1
1	SOX13	2	1	0.427039	0.742568	1	1
1	SOX15	5	3	0.310102	0.806625	1	1
1	SOX17	0	0	0.67967	0.657514	1	1
1	SOX17	1	1	0.621506	0.585407	1	1
1	SOX18	0	0	0.604012	0.557807	1	1
1	SOX2	0	0	0.90496	0.90021	1	1
1	SOX21	0	0	0.693272	0.672599	1	1
1	SOX3	0	0	0.909679	0.905162	1	1
1	SOX30	4	1	0.214439	0.870945	1	1
1	SOX4	0	1	0.776242	0.386433	1	1
1	SOX4	1	0	0.413066	0.771483	1	1
1	SOX5	0	0	0.826832	0.817601	1	1
1	SOX5	1	0	0.425075	0.746724	1	1
1	SOX6	0	0	0.890021	0.884442	1	1
1	SOX8	1	1	0.615814	0.576938	1	1
1	SOX9	0	0	0.613235	0.573793	1	1
1	SP1	0	0	0.964471	0.962752	1	1
1	SP100	2	1	0.428072	0.740267	1	1
1	SP2	0	0	0.93394	0.930658	1	1
1	SP4	0	0	0.599828	0.460153	1	1
1	SPAG7	0	0	0.98666	0.986025	1	1
1	SPATS2	0	0	1	1	1	1
1	SPDEF	5	8	0.865121	0.208115	1	1
1	SPIB	0	0	0.713319	0.69526	1	1
1	SPR	0	0	1	1	1	1
1	SPZ1	1	1	0.680671	0.658563	1	1
1	SRBD1	0	0	0.897503	0.892363	1	1
1	SREBF1	0	0	0.98869	0.988151	1	1
1	SREBF2	0	0	0.831932	0.822966	1	1
1	SRF	2	2	0.597319	0.544269	1	1
1	SRF	4	4	0.588274	0.517711	1	1
1	SRP9	0	0	0.977719	0.976655	1	1
1	SSBP3	0	0	0.956962	0.954883	1	1
1	STAT1	8	5	0.23462	0.850793	1	1
1	STAT3	6	4	0.301875	0.816456	1	1
1	STAT4	5	2	0.17593	0.906299	1	1
1	STAT6	5	4	0.438903	0.716916	1	1
1	STAU2	0	0	0.918173	0.914106	1	1
1	STUB1	0	0	1	1	1	1
1	SUCLG1	0	0	0.73994	0.724362	1	1
1	T	0	0	0.899389	0.894311	1	1
1	TAF9	0	0	1	1	1	1
1	TAGLN2	0	0	1	1	1	1
1	TBP	0	2	0.817608	0.283158	1	1
1	TBP	0	0	0.703742	0.684307	1	1
1	TBPL1	0	0	0.94806	0.945533	1	1
1	TCEAL6	0	0	1	1	1	1
1	TCF12	0	0	0.802517	0.791625	1	1
1	TCF3	0	0	0.852064	0.84435	1	1
1	TCF3	0	0	0.820487	0.810779	1	1
1	TCF3	2	0	0.345451	0.76177	1	1
1	TCF7	3	2	0.460832	0.668776	1	1
1	TCFAP2A	3	3	0.597436	0.545019	1	1
1	TCFAP2B	0	0	0.604496	0.558921	1	1
1	TCFAP2C	1	2	0.724352	0.403497	1	1
1	TCFAP2E	4	1	0.166203	0.914554	1	1
1	TCFCP2L1	4	4	0.590639	0.527364	1	1
1	TEAD1	0	0	0.893312	0.887935	1	1
1	TEAD1	0	0	0.956263	0.954133	1	1
1	TFAM	0	0	1	1	1	1
1	TFAP2A	1	1	0.936912	0.933815	1	1
1	TFAP2A	0	0	0.710378	0.691712	1	1
1	TGIF1	0	0	0.901045	0.896105	1	1
1	TGIF1	19	8	0.0114133	0.993749	1	1
1	TGIF2	13	7	0.111663	0.927144	1	1
1	THAP1	3	2	0.446181	0.700563	1	1
1	THRA	0	0	1	1	1	1
1	TIA1	0	0	1	1	1	1
1	TIMELESS	0	0	1	1	1	1
1	TIMM44	0	0	1	1	1	1
1	TITF1	3	4	0.701397	0.40914	1	1
1	TLX2	0	0	0.679501	0.65695	1	1
1	TOB2	0	0	1	1	1	1
1	TPI1	0	0	1	1	1	1
1	TPPP	0	0	0.787519	0.775657	1	1
1	TRIM21	0	0	0.742007	0.72667	1	1
1	TRIM69	0	0	1	1	1	1
1	TRIP10	1	1	0.791922	0.780369	1	1
1	TRMT1	0	0	1	1	1	1
1	TROVE2	0	0	1	1	1	1
1	TSC22D4	0	0	0.837467	0.828877	1	1
1	TSN	0	0	0.713478	0.695399	1	1
1	TSNAX	0	0	1	1	1	1
1	TULP1	0	0	0.891782	0.886332	1	1
1	U2AF1	0	0	1	1	1	1
1	UBB	0	0	1	1	1	1
1	UBE2V1	0	0	0.665845	0.641627	1	1
1	UGP2	0	0	1	1	1	1
1	UNCX4.1	0	1	0.735886	0.400078	1	1
1	UQCRB	0	0	0.923389	0.919624	1	1
1	USF1	0	0	1	1	1	1
1	USF1	2	2	0.703645	0.684397	1	1
1	USF2	0	0	0.892376	0.886969	1	1
1	USF2	1	0	0.197335	0.973309	1	1
1	USP39	0	0	0.746869	0.731914	1	1
1	UTP18	0	0	0.769835	0.756732	1	1
1	VAMP3	0	0	0.862997	0.855907	1	1
1	VAX1	5	5	0.590792	0.52734	1	1
1	VAX2	2	0	0.134996	0.961372	1	1
1	VAX2	1	1	0.591047	0.528193	1	1
1	VPS4B	0	0	1	1	1	1
1	VSX1	0	0	0.991735	0.991342	1	1
1	VSX1	1	1	0.600944	0.551928	1	1
1	WISP2	0	0	1	1	1	1
1	XRCC1	0	0	0.762801	0.749105	1	1
1	YEATS4	0	0	1	1	1	1
1	YWHAE	0	0	0.993757	0.993463	1	1
1	YWHAZ	0	0	1	1	1	1
1	YY1	2	1	0.395369	0.804896	1	1
1	ZBTB12	0	0	0.900524	0.895537	1	1
1	ZBTB12	8	6	0.356985	0.746509	1	1
1	ZBTB25	0	0	1	1	1	1
1	ZBTB3	13	14	0.696512	0.410083	1	1
1	ZBTB33	1	1	0.738002	0.72203	1	1
1	ZBTB4	1	1	0.771562	0.758537	1	1
1	ZBTB43	0	0	1	1	1	1
1	ZBTB46	0	0	0.78385	0.77175	1	1
1	ZBTB7B	0	0	0.660075	0.634481	1	1
1	ZC3H7A	0	0	0.860548	0.853316	1	1
1	ZCCHC14	0	0	1	1	1	1
1	ZCCHC17	0	0	1	1	1	1
1	ZDHHC15	1	1	0.663912	0.639316	1	1
1	ZDHHC5	0	0	1	1	1	1
1	ZEB1	0	0	0.957013	0.954933	1	1
1	ZFP105	0	0	0.678059	0.655395	1	1
1	ZFP128	7	3	0.131328	0.926933	1	1
1	ZFP161	8	0	1.77243e-05	0.999998	0.0215107	1
1	ZFP187	2	4	0.844494	0.26266	1	1
1	ZFP281	0	0	0.599231	0.461053	1	1
1	ZFP3	0	0	0.678469	0.656189	1	1
1	ZFP410	0	1	0.778834	0.385364	1	1
1	ZFP423	0	0	0.978883	0.977862	1	1
1	ZFP691	10	8	0.372997	0.724934	1	1
1	ZFP740	0	0	0.600173	0.459318	1	1
1	ZFX	3	2	0.325988	0.898224	1	1
1	ZHX3	1	1	0.689366	0.668459	1	1
1	ZIC1	0	0	0.716638	0.698664	1	1
1	ZIC2	0	0	0.673136	0.649736	1	1
1	ZIC3	0	0	0.678635	0.656054	1	1
1	ZMAT2	0	0	1	1	1	1
1	ZMAT4	0	0	1	1	1	1
1	ZRSR2	0	0	1	1	1	1
1	ZSWIM1	0	0	0.904111	0.899326	1	1
2	ABCF2	1	1	0.87298	0.877195	1	1
2	ACO1	0	0	1	1	1	1
2	ADARB1	0	0	0.878934	0.882996	1	1
2	AFF4	0	0	1	1	1	1
2	AGGF1	0	0	1	1	1	1
2	ALX3	8	7	0.375304	0.810625	1	1
2	ALX4	4	9	0.996963	0.0111528	1	1
2	ANXA1	0	0	0.98324	0.983763	1	1
2	ANXA11	0	0	1	1	1	1
2	APEX2	0	0	0.847056	0.852287	1	1
2	AR	0	2	0.99565	0.0378547	1	1
2	ARFGAP1	0	1	0.995352	0.0906031	1	1
2	ARID3A	0	0	1	1	1	1
2	ARID3A	2	5	0.982205	0.0615853	1	1
2	ARID5A	0	0	0.641905	0.659425	1	1
2	ARNT	0	0	1	1	1	1
2	ARNTL	0	0	0.926113	0.928516	1	1
2	ARX	6	6	0.605922	0.628675	1	1
2	ASCC1	0	0	1	1	1	1
2	ASCL2	7	1	0.0118939	0.995829	1	1
2	ASPSCR1	0	0	0.934122	0.936232	1	1
2	ATF1	1	2	0.749768	0.420093	1	1
2	ATOH1	0	0	0.969607	0.970566	1	1
2	BARHL1	1	5	0.996818	0.0143285	1	1
2	BARHL2	0	3	0.998565	0.0111793	1	1
2	BARX1	0	0	1	1	1	1
2	BARX1	5	6	0.772929	0.409128	1	1
2	BARX2	2	7	0.999436	0.00303142	1	0.621532
2	BAX	0	0	1	1	1	1
2	BBX	0	1	0.811463	0.389069	1	1
2	BCL11A	0	0	1	1	1	1
2	BCL6	3	2	0.372936	0.815777	1	1
2	BCL6B	4	3	0.399206	0.753037	1	1
2	BOLL	0	0	1	1	1	1
2	BRCA1	0	0	0.935743	0.9378	1	1
2	BSX	4	6	0.868796	0.253367	1	1
2	CANX	0	0	1	1	1	1
2	CAT	0	0	0.85042	0.855496	1	1
2	CBFA2T2	0	0	0.915067	0.91782	1	1
2	CBFB	0	1	0.87468	0.346186	1	1
2	CBX3	0	0	0.974245	0.975052	1	1
2	CBX7	0	0	1	1	1	1
2	CCDC25	0	0	0.866428	0.870881	1	1
2	CDX1	1	2	0.83263	0.376607	1	1
2	CDX2	0	0	0.984656	0.985144	1	1
2	CDX2	0	2	0.936458	0.17544	1	1
2	CEBPA	0	0	0.911371	0.914311	1	1
2	CEBPB	0	0	0.879555	0.883636	1	1
2	CEBPG	0	0	0.835474	0.841098	1	1
2	CFL2	0	0	1	1	1	1
2	CLK1	0	0	1	1	1	1
2	CNOT6	0	0	0.956473	0.957857	1	1
2	CPHX	3	3	0.584493	0.6113	1	1
2	CPSF4	0	0	1	1	1	1
2	CREB1	0	0	1	1	1	1
2	CREB1	0	0	0.844372	0.849706	1	1
2	CREB3L1	0	0	1	1	1	1
2	CRX	0	0	0.932959	0.935154	1	1
2	CRX	1	0	0.378872	0.803066	1	1
2	CSNK2B	0	0	1	1	1	1
2	CSTF2	0	0	1	1	1	1
2	CTCF	2	3	0.841883	0.370768	1	1
2	CUTL1	0	6	0.999806	0.00104917	1	0.316422
2	CUTL1	4	5	0.731935	0.428262	1	1
2	CYB5R1	0	0	0.997621	0.997695	1	1
2	CYCS	0	0	1	1	1	1
2	DAB2	0	0	1	1	1	1
2	DAZAP1	0	0	1	1	1	1
2	DBX1	0	4	0.999875	0.00125829	1	0.350117
2	DBX2	1	8	0.999998	1.71879e-05	1	0.0140554
2	DDX20	0	0	0.89349	0.89701	1	1
2	DDX4	0	0	1	1	1	1
2	DGCR8	0	0	0.956291	0.957674	1	1
2	DHX36	0	0	0.949264	0.950884	1	1
2	DIABLO	1	0	0.112814	0.992461	1	1
2	DIS3	0	0	1	1	1	1
2	DLX1	3	6	0.981579	0.0629685	1	1
2	DLX2	3	7	0.988183	0.036883	1	1
2	DLX3	3	6	0.960275	0.102824	1	1
2	DLX4	3	6	0.957939	0.106575	1	1
2	DLX5	6	8	0.865911	0.256131	1	1
2	DLX6	0	0	1	1	1	1
2	DMBX1	0	0	0.609555	0.63169	1	1
2	DNMT3A	0	0	1	1	1	1
2	DTL	0	0	0.977686	0.978387	1	1
2	DUS3L	0	0	1	1	1	1
2	DUSP22	0	0	1	1	1	1
2	DUSP26	0	0	1	1	1	1
2	E2F1	0	0	0.999216	0.999241	1	1
2	E2F2	0	0	0.729306	0.740245	1	1
2	E2F3	0	0	0.990128	0.990448	1	1
2	E2F3	0	0	0.713495	0.725372	1	1
2	E2F4	0	0	0.996875	0.996973	1	1
2	E2F6	0	0	0.996486	0.996597	1	1
2	EBF1	0	0	1	1	1	1
2	EBF1	0	0	0.836421	0.842154	1	1
2	ECSIT	0	0	1	1	1	1
2	EDN1	0	0	0.942462	0.944316	1	1
2	EEF1D	0	0	0.960838	0.962087	1	1
2	EGR1	0	1	0.999083	0.0417459	1	1
2	EGR1	1	0	0.0982073	0.99443	1	1
2	EGR2	0	0	0.9099	0.912956	1	1
2	EHF	0	0	0.977314	0.978027	1	1
2	EHF	1	3	0.915965	0.202531	1	1
2	EIF5A2	0	0	0.966002	0.967077	1	1
2	ELF1	0	0	0.980731	0.981352	1	1
2	ELF2	0	0	1	1	1	1
2	ELF3	0	1	0.849897	0.365161	1	1
2	ELF5	0	1	0.946859	0.258913	1	1
2	ELK1	0	0	0.885386	0.889233	1	1
2	ELK4	0	0	0.915197	0.918003	1	1
2	EMX2	6	6	0.579323	0.607849	1	1
2	EN1	0	3	0.99362	0.0312107	1	1
2	EN1	5	6	0.817884	0.385455	1	1
2	EN2	6	6	0.594951	0.619792	1	1
2	ENO1	0	0	1	1	1	1
2	EOMES	1	0	0.36831	0.824724	1	1
2	ERG	0	0	0.962217	0.963434	1	1
2	ESR2	6	4	0.247579	0.865201	1	1
2	ESRRA	0	0	0.978337	0.979014	1	1
2	ESRRA	1	0	0.302284	0.913063	1	1
2	ESRRA	2	1	0.398929	0.753631	1	1
2	ESRRB	5	2	0.122993	0.944518	1	1
2	ESX1	0	0	1	1	1	1
2	ESX1	3	5	0.952683	0.150236	1	1
2	ETFB	0	0	1	1	1	1
2	ETS1	0	0	1	1	1	1
2	ETS1	0	0	0.910186	0.913231	1	1
2	ETV4	0	0	1	1	1	1
2	EVX1	0	0	1	1	1	1
2	EVX1	5	6	0.760608	0.41508	1	1
2	EVX2	6	8	0.862196	0.259671	1	1
2	EWSR1	0	0	0.972155	0.973033	1	1
2	FEV	0	0	0.941564	0.943438	1	1
2	FEZ1	0	0	1	1	1	1
2	FEZF2	0	0	0.958391	0.959706	1	1
2	FHL2	0	0	0.9803	0.980918	1	1
2	FIP1L1	0	0	0.847281	0.852503	1	1
2	FLI1	0	0	0.99171	0.991967	1	1
2	FLI1	0	0	0.967502	0.968545	1	1
2	FOS	0	0	0.876488	0.880683	1	1
2	FOSL1	0	0	0.950829	0.952405	1	1
2	FOSL1	0	0	0.87497	0.879221	1	1
2	FOSL2	0	1	0.97493	0.192125	1	1
2	FOXA1	0	0	0.808955	0.815966	1	1
2	FOXA2	0	0	0.809908	0.816768	1	1
2	FOXA2	0	0	0.678006	0.692482	1	1
2	FOXC1	0	0	0.84932	0.854464	1	1
2	FOXD1	0	0	0.989811	0.990129	1	1
2	FOXD3	0	0	0.925464	0.927927	1	1
2	FOXF2	0	0	0.989332	0.989676	1	1
2	FOXH1	0	0	0.986913	0.987329	1	1
2	FOXI1	0	0	0.952455	0.954002	1	1
2	FOXJ1	0	1	0.906762	0.315685	1	1
2	FOXJ3	0	0	0.687733	0.701473	1	1
2	FOXK1	0	0	0.696778	0.709878	1	1
2	FOXL1	0	0	0.824902	0.831005	1	1
2	FOXL1	0	0	0.735987	0.746663	1	1
2	FOXM1	0	0	0.858618	0.86336	1	1
2	FOXN3	0	0	0.942655	0.944483	1	1
2	FOXO1	0	0	0.901902	0.905176	1	1
2	FOXP1	0	0	0.944538	0.94638	1	1
2	FOXP2	0	0	0.955652	0.957085	1	1
2	FOXP4	0	0	0.995301	0.995449	1	1
2	FOXQ1	0	0	0.951577	0.953146	1	1
2	GABPA	1	0	0.119072	0.991507	1	1
2	GABPA	0	4	0.993145	0.0250059	1	1
2	GADD45A	0	0	1	1	1	1
2	GATA1	0	0	0.976146	0.976909	1	1
2	GATA2	0	0	0.913869	0.916767	1	1
2	GATA3	0	0	1	1	1	1
2	GATA4	0	0	0.955994	0.957416	1	1
2	GATA5	2	2	0.633933	0.652639	1	1
2	GATA6	1	2	0.837267	0.373706	1	1
2	GBX1	4	7	0.974841	0.0769855	1	1
2	GBX2	7	9	0.875944	0.246408	1	1
2	GCM1	3	1	0.132661	0.961026	1	1
2	GFI1	0	0	0.820459	0.826808	1	1
2	GFI1B	1	1	0.746897	0.75666	1	1
2	GIT2	0	0	0.913532	0.916323	1	1
2	GLIS2	1	0	0.286925	0.925796	1	1
2	GM397	1	1	0.558621	0.59382	1	1
2	GMEB1	0	0	0.645115	0.662565	1	1
2	GOT1	0	0	1	1	1	1
2	GPAM	0	0	1	1	1	1
2	GPD1	0	0	1	1	1	1
2	GRHL1	0	0	0.979177	0.979831	1	1
2	GRHPR	0	0	1	1	1	1
2	GSC	1	1	0.61108	0.632965	1	1
2	GTF2B	0	0	0.917478	0.920135	1	1
2	GTF2H3	0	0	1	1	1	1
2	GTF3C2	0	0	1	1	1	1
2	GTPBP1	0	0	1	1	1	1
2	GTPBP6	0	0	0.860778	0.865463	1	1
2	H1FX	0	0	0.94668	0.948376	1	1
2	H2AFY	0	0	0.820684	0.82699	1	1
2	H2AFZ	0	0	0.965227	0.966339	1	1
2	HBP1	0	4	0.992821	0.0258477	1	1
2	HCFC2	0	0	0.909692	0.912629	1	1
2	HCLS1	0	0	0.984831	0.985306	1	1
2	HDAC8	0	0	1	1	1	1
2	HDX	0	2	0.894563	0.227153	1	1
2	HES5	0	0	0.976743	0.977467	1	1
2	HHAT	0	0	1	1	1	1
2	HHEX	1	1	0.840109	0.845581	1	1
2	HIC1	4	1	0.0735027	0.975773	1	1
2	HIST1H2BN	0	0	0.989472	0.989803	1	1
2	HIST2H2AB	0	1	0.962041	0.227428	1	1
2	HIST2H2BE	0	0	0.947004	0.948716	1	1
2	HLCS	0	0	1	1	1	1
2	HLF	1	1	0.704288	0.716554	1	1
2	HLTF	0	0	0.817557	0.824026	1	1
2	HMBOX1	3	6	0.960275	0.102824	1	1
2	HMG20A	0	0	1	1	1	1
2	HMX1	2	5	0.964405	0.0959647	1	1
2	HMX2	1	3	0.9443	0.163781	1	1
2	HMX3	0	3	0.985769	0.0532323	1	1
2	HNF1A	0	3	0.99953	0.00507582	1	0.885683
2	HNF1B	0	0	0.990371	0.990678	1	1
2	HNF4A	1	3	0.858635	0.262946	1	1
2	HNF4A	6	3	0.109142	0.954327	1	1
2	HNF4G	1	6	0.990441	0.0265235	1	1
2	HNRNPA1	0	0	0.828899	0.834873	1	1
2	HNRNPC	0	0	0.922717	0.92521	1	1
2	HOMEZ	0	0	0.631299	0.650326	1	1
2	HOXA1	3	5	0.914499	0.204336	1	1
2	HOXA10	0	4	0.999136	0.00545274	1	0.934436
2	HOXA11	0	2	0.924371	0.191937	1	1
2	HOXA13	1	1	0.594691	0.619462	1	1
2	HOXA2	3	6	0.959373	0.104275	1	1
2	HOXA3	4	6	0.906315	0.213981	1	1
2	HOXA3	4	6	0.904718	0.215814	1	1
2	HOXA4	2	5	0.987736	0.0482754	1	1
2	HOXA5	3	1	0.0760626	0.985707	1	1
2	HOXA5	3	6	0.962672	0.0988722	1	1
2	HOXA6	3	5	0.923111	0.193568	1	1
2	HOXA7	3	7	0.988707	0.0357192	1	1
2	HOXA7	3	6	0.962881	0.0985242	1	1
2	HOXA9	0	0	0.839396	0.84501	1	1
2	HOXA9	0	4	0.996579	0.0151106	1	1
2	HOXB13	0	0	0.991091	0.991374	1	1
2	HOXB13	0	1	0.923937	0.294737	1	1
2	HOXB3	6	6	0.580972	0.609062	1	1
2	HOXB4	3	7	0.995653	0.0179911	1	1
2	HOXB5	3	6	0.966002	0.0932171	1	1
2	HOXB6	2	7	0.996471	0.012503	1	1
2	HOXB7	2	7	0.998784	0.00551647	1	0.941385
2	HOXB8	1	6	0.999047	0.00456506	1	0.827715
2	HOXB9	0	0	1	1	1	1
2	HOXB9	0	2	0.960552	0.136248	1	1
2	HOXC10	0	2	0.90208	0.218842	1	1
2	HOXC11	0	1	0.808887	0.390541	1	1
2	HOXC12	0	2	0.899798	0.221415	1	1
2	HOXC13	0	0	0.606847	0.629325	1	1
2	HOXC4	2	7	0.99938	0.00326523	1	0.654357
2	HOXC5	5	9	0.995798	0.017554	1	1
2	HOXC6	2	4	0.952683	0.150236	1	1
2	HOXC8	3	5	0.941577	0.16792	1	1
2	HOXC9	0	0	0.717581	0.729086	1	1
2	HOXC9	2	5	0.959008	0.104862	1	1
2	HOXD1	5	6	0.759047	0.415817	1	1
2	HOXD10	0	0	0.683386	0.697448	1	1
2	HOXD11	0	1	0.785555	0.402908	1	1
2	HOXD12	0	2	0.900142	0.221032	1	1
2	HOXD13	0	0	0.688259	0.701888	1	1
2	HOXD3	0	0	0.953513	0.954986	1	1
2	HOXD3	3	6	0.957839	0.106725	1	1
2	HOXD8	1	4	0.997509	0.016413	1	1
2	HP1BP3	0	0	0.94668	0.948376	1	1
2	HSF1	0	0	0.714425	0.725764	1	1
2	HSF1	0	0	0.613726	0.634973	1	1
2	HSPA1L	0	0	1	1	1	1
2	HSPA5	0	0	0.998008	0.998069	1	1
2	ID2	0	0	1	1	1	1
2	ING3	0	0	0.85647	0.861292	1	1
2	INSM1	0	0	0.88348	0.887357	1	1
2	INSM1	0	0	0.906814	0.90993	1	1
2	IRF1	0	0	1	1	1	1
2	IRF2	0	0	0.993603	0.993814	1	1
2	IRF3	0	1	0.920078	0.299765	1	1
2	IRF4	0	1	0.840195	0.371747	1	1
2	IRF5	0	1	0.878432	0.343258	1	1
2	IRF6	0	0	0.909102	0.912059	1	1
2	IRF6	0	1	0.838933	0.372632	1	1
2	IRX2	2	1	0.367834	0.825642	1	1
2	IRX3	2	1	0.375957	0.809247	1	1
2	IRX3	2	2	0.607309	0.629822	1	1
2	IRX4	1	1	0.616937	0.637912	1	1
2	IRX5	2	0	0.185254	0.925532	1	1
2	IRX6	2	0	0.160416	0.943948	1	1
2	ISGF3G	0	1	0.907832	0.31447	1	1
2	ISL2	1	6	0.999885	0.000861018	1	0.27976
2	ISX	6	11	0.991541	0.0242051	1	1
2	IVD	0	0	1	1	1	1
2	JUN	0	0	0.841103	0.846709	1	1
2	JUNB	0	0	0.893589	0.89716	1	1
2	JUNDM2	2	4	0.868367	0.25378	1	1
2	KCNIP1	0	0	0.874064	0.878441	1	1
2	KIF22	0	0	1	1	1	1
2	KLF1	0	0	0.98316	0.983696	1	1
2	KLF3	1	1	0.874704	0.878878	1	1
2	KLF4	0	0	1	1	1	1
2	KLF4	0	0	0.959262	0.960569	1	1
2	KLF5	0	0	0.974943	0.97574	1	1
2	KLF7	1	0	0.186812	0.97607	1	1
2	LARP1	0	0	0.939261	0.941211	1	1
2	LARP4	0	1	0.953359	0.246431	1	1
2	LAS1L	0	0	1	1	1	1
2	LBX2	5	7	0.899729	0.221491	1	1
2	LEF1	2	1	0.379421	0.801761	1	1
2	LHX1	1	6	0.99996	0.000369636	1	0.149628
2	LHX2	0	0	1	1	1	1
2	LHX2	6	7	0.796409	0.39731	1	1
2	LHX3	1	5	0.999856	0.00140135	1	0.378595
2	LHX3	0	0	0.993071	0.993293	1	1
2	LHX4	0	0	1	1	1	1
2	LHX4	5	8	0.96157	0.100706	1	1
2	LHX5	3	7	0.999658	0.00270896	1	0.577111
2	LHX6	4	4	0.59883	0.622892	1	1
2	LHX6	7	6	0.392299	0.771186	1	1
2	LHX8	8	8	0.572173	0.602735	1	1
2	LHX9	4	9	0.998913	0.00505541	1	0.885016
2	LMX1A	1	6	0.999958	0.000389581	1	0.155125
2	LMX1B	1	4	0.999182	0.00752299	1	1
2	LSM6	0	0	1	1	1	1
2	MAFB	1	0	0.301216	0.914057	1	1
2	MAFB	1	6	0.982966	0.040779	1	1
2	MAFF	1	1	0.603951	0.627171	1	1
2	MAFK	0	1	0.932927	0.281983	1	1
2	MAFK	1	3	0.859967	0.261707	1	1
2	MAGEA8	0	0	0.94668	0.948376	1	1
2	MAGOH	0	0	0.956839	0.958225	1	1
2	MAP4K2	0	0	0.875218	0.879372	1	1
2	MAPK1	0	0	1	1	1	1
2	MAX	0	0	0.959262	0.960569	1	1
2	MAX	2	3	0.776287	0.407485	1	1
2	MBTPS2	0	0	0.961024	0.96226	1	1
2	MCTP2	0	0	1	1	1	1
2	MDM2	0	0	0.967799	0.968817	1	1
2	MECP2	0	0	1	1	1	1
2	MEF2A	0	2	0.997499	0.0269081	1	1
2	MEF2C	0	0	0.799381	0.806814	1	1
2	MEIS1	1	0	0.239901	0.955052	1	1
2	MEIS1	3	1	0.259735	0.850986	1	1
2	MEOX1	4	6	0.876204	0.246126	1	1
2	MEX3C	0	0	0.953362	0.954848	1	1
2	MLX	0	0	0.970697	0.971621	1	1
2	MORN1	0	0	1	1	1	1
2	MRG2	2	1	0.403137	0.74195	1	1
2	MRPL1	0	0	0.809835	0.816592	1	1
2	MRPL2	0	0	0.932412	0.934602	1	1
2	MRPS25	0	0	0.88979	0.89346	1	1
2	MSI1	0	0	0.899173	0.902458	1	1
2	MSI2	0	0	1	1	1	1
2	MSRA	0	0	1	1	1	1
2	MSRB3	0	0	1	1	1	1
2	MSX1	2	6	0.998227	0.00931789	1	1
2	MSX2	6	8	0.884587	0.237676	1	1
2	MSX3	1	6	0.999935	0.00054841	1	0.19887
2	MTF1	4	2	0.211878	0.902285	1	1
2	MTHFD1	0	0	1	1	1	1
2	MXD4	0	0	0.891165	0.894748	1	1
2	MYB	0	0	0.880926	0.884937	1	1
2	MYB	1	2	0.772075	0.409589	1	1
2	MYBL1	0	2	0.889872	0.232165	1	1
2	MYC	0	0	0.910146	0.913113	1	1
2	MYCN	0	0	0.993303	0.993512	1	1
2	MYEF2	0	0	1	1	1	1
2	MYF6	0	0	0.790541	0.798013	1	1
2	MYF6	5	1	0.0726717	0.967544	1	1
2	MYLK	0	0	1	1	1	1
2	MYOD1	0	0	0.946343	0.94805	1	1
2	MYOD1	1	0	0.154723	0.984658	1	1
2	MYOG	1	0	0.0611551	0.997967	1	1
2	NANOS1	0	0	1	1	1	1
2	NAP1L1	0	0	1	1	1	1
2	NCALD	0	0	0.994451	0.994623	1	1
2	NCBP2	0	0	1	1	1	1
2	NELFB	0	0	0.976471	0.977207	1	1
2	NFATC2	0	0	0.852266	0.857272	1	1
2	NFATC3	0	0	1	1	1	1
2	NFATC4	0	0	1	1	1	1
2	NFE2L2	0	1	0.950835	0.251505	1	1
2	NFIB	0	0	1	1	1	1
2	NFIC	4	4	0.575996	0.603966	1	1
2	NFIL3	0	0	1	1	1	1
2	NFIL3	0	0	0.911663	0.914593	1	1
2	NFIX	0	0	1	1	1	1
2	NFKB1	1	1	0.663041	0.678278	1	1
2	NFYA	2	1	0.365568	0.829865	1	1
2	NFYB	0	0	0.968769	0.969792	1	1
2	NHLH1	1	0	0.257495	0.945587	1	1
2	NKX1-2	5	5	0.588596	0.614822	1	1
2	NKX2-2	1	4	0.932354	0.143166	1	1
2	NKX2-3	0	0	0.774808	0.783025	1	1
2	NKX2-3	1	6	0.989142	0.0291759	1	1
2	NKX2-4	2	3	0.794511	0.398264	1	1
2	NKX2-5	0	2	0.999253	0.0125569	1	1
2	NKX2-5	3	5	0.882749	0.239539	1	1
2	NKX2-6	2	4	0.927846	0.187357	1	1
2	NKX2-9	0	3	0.945065	0.125872	1	1
2	NKX3-1	0	0	0.817039	0.823429	1	1
2	NKX3-1	2	7	0.993468	0.0199342	1	1
2	NKX3-1	2	4	0.903545	0.217205	1	1
2	NKX3-2	1	1	0.832412	0.838244	1	1
2	NKX6-1	3	9	0.999937	0.000419996	1	0.164019
2	NKX6-1	1	6	0.999511	0.00270926	1	0.577111
2	NKX6-3	1	7	0.999953	0.000331192	1	0.137397
2	NME1	0	1	0.999097	0.0414226	1	1
2	NMI	0	0	0.796096	0.803402	1	1
2	NMRAL1	0	0	1	1	1	1
2	NNT	0	0	1	1	1	1
2	NOBOX	1	5	0.999992	0.000152192	1	0.0738794
2	NONO	0	0	0.936721	0.938745	1	1
2	NR2C2	0	0	0.520084	0.576549	1	1
2	NR2E3	0	0	0.903847	0.906986	1	1
2	NR2F1	0	0	1	1	1	1
2	NR2F1	0	0	0.826831	0.833049	1	1
2	NR2F2	1	3	0.876041	0.246288	1	1
2	NR4A1	0	0	0.787478	0.795046	1	1
2	NR4A2	0	0	0.934769	0.936858	1	1
2	NR4A2	0	0	0.875917	0.880067	1	1
2	NR5A2	2	2	0.649303	0.666144	1	1
2	NRF1	0	0	0.979819	0.980463	1	1
2	NRL	0	0	1	1	1	1
2	NUCB1	0	0	0.961924	0.963125	1	1
2	NUP107	0	0	0.853895	0.858839	1	1
2	NUP133	0	0	1	1	1	1
2	NXPH3	0	0	0.916277	0.918988	1	1
2	OBOX1	0	1	0.818245	0.385283	1	1
2	OBOX3	1	2	0.794813	0.398147	1	1
2	OBOX5	1	2	0.805456	0.392465	1	1
2	OBOX5	1	2	0.834622	0.37539	1	1
2	OBOX6	0	1	0.811565	0.389012	1	1
2	ODC1	0	0	1	1	1	1
2	OLIG1	0	0	0.919325	0.921932	1	1
2	OLIG3	0	1	0.977672	0.182986	1	1
2	OSR1	0	3	0.943843	0.12759	1	1
2	OSR2	2	6	0.975835	0.0609472	1	1
2	OTP	4	7	0.985949	0.0527907	1	1
2	OTUD4	0	0	1	1	1	1
2	OTX1	0	1	0.89674	0.326305	1	1
2	OTX2	0	1	0.802669	0.393977	1	1
2	P4HB	0	0	1	1	1	1
2	PAX2	1	2	0.752901	0.418267	1	1
2	PAX3	1	0	0.15635	0.984283	1	1
2	PAX4	3	4	0.790885	0.400186	1	1
2	PAX5	0	0	0.66033	0.676464	1	1
2	PAX6	0	0	0.692074	0.70529	1	1
2	PAX6	2	6	0.998529	0.00810997	1	1
2	PAX7	4	6	0.908446	0.211561	1	1
2	PAXIP1	0	0	0.870185	0.874501	1	1
2	PBX1	0	0	0.991132	0.991414	1	1
2	PBX1	0	1	0.83824	0.37308	1	1
2	PCK2	0	0	0.982405	0.982951	1	1
2	PDCD11	0	0	0.903847	0.906986	1	1
2	PDE6H	0	0	0.935031	0.937122	1	1
2	PDLIM5	0	0	1	1	1	1
2	PDS5A	0	0	0.95769	0.959027	1	1
2	PDX1	2	1	0.165783	0.981988	1	1
2	PGAM2	0	0	1	1	1	1
2	PHLDA2	0	0	1	1	1	1
2	PHOX2A	0	0	1	1	1	1
2	PHOX2A	5	9	0.989643	0.0335873	1	1
2	PHOX2B	3	7	0.996732	0.0146148	1	1
2	PHTF1	0	0	1	1	1	1
2	PICK1	0	0	0.844469	0.849745	1	1
2	PIK3C3	0	0	1	1	1	1
2	PIR	0	0	1	1	1	1
2	PITX1	0	0	0.909942	0.912855	1	1
2	PITX1	0	3	0.980593	0.0651449	1	1
2	PITX2	0	1	0.820239	0.384123	1	1
2	PITX3	2	2	0.616231	0.637204	1	1
2	PKNOX1	3	1	0.255938	0.8555	1	1
2	PKNOX2	0	0	1	1	1	1
2	PKNOX2	6	1	0.0337977	0.986302	1	1
2	PLAG1	0	0	0.995387	0.995535	1	1
2	PLAGL1	0	0	1	1	1	1
2	PLAGL1	0	0	0.765981	0.775025	1	1
2	PLG	0	0	1	1	1	1
2	POLE3	0	0	0.892543	0.896077	1	1
2	POLI	0	0	1	1	1	1
2	POU1F1	2	8	0.999998	2.46269e-05	1	0.0185224
2	POU2F1	0	4	0.999718	0.002338	1	0.523661
2	POU2F2	0	0	0.813612	0.82035	1	1
2	POU2F2	0	0	0.594342	0.619186	1	1
2	POU2F3	0	0	0.62441	0.644223	1	1
2	POU3F1	1	7	0.999999	9.86762e-06	1	0.00939305
2	POU3F2	0	1	0.985014	0.154126	1	1
2	POU3F2	3	7	0.998962	0.00625551	1	1
2	POU3F3	0	0	0.621688	0.641977	1	1
2	POU3F4	0	8	1	3.78247e-08	1	0.000148668
2	POU4F3	0	5	0.999868	0.000961505	1	0.302722
2	POU4F3	0	0	1	1	1	1
2	POU6F1	3	6	0.958317	0.105974	1	1
2	POU6F1	1	5	0.992462	0.0267708	1	1
2	PPP1R10	0	0	1	1	1	1
2	PPP5C	0	1	0.965913	0.21786	1	1
2	PQBP1	0	0	0.786677	0.794358	1	1
2	PRDM1	0	1	0.989436	0.132022	1	1
2	PRDX5	0	0	1	1	1	1
2	PRKRIR	0	0	0.989811	0.990129	1	1
2	PRNP	0	0	1	1	1	1
2	PROP1	1	3	0.981479	0.0894372	1	1
2	PRRX1	1	1	0.935743	0.9378	1	1
2	PRRX1	6	9	0.982205	0.0615853	1	1
2	PRRX2	0	0	1	1	1	1
2	PRRX2	7	7	0.602612	0.625958	1	1
2	PSMA6	0	0	0.877543	0.881613	1	1
2	PSMC2	1	0	0.111242	0.99269	1	1
2	PTCD1	0	0	0.92426	0.926714	1	1
2	PTPMT1	0	0	1	1	1	1
2	PURG	0	0	0.957518	0.958867	1	1
2	R3HDM2	0	0	1	1	1	1
2	RAB14	0	0	0.993273	0.993482	1	1
2	RAB18	0	0	1	1	1	1
2	RAN	0	0	0.981803	0.982374	1	1
2	RARA	0	0	1	1	1	1
2	RARA	3	3	0.569153	0.600507	1	1
2	RARB	0	0	1	1	1	1
2	RARG	0	0	1	1	1	1
2	RAX	0	0	0.940995	0.942877	1	1
2	RAX	5	5	0.605637	0.628439	1	1
2	RBBP5	0	0	1	1	1	1
2	RBBP9	0	0	1	1	1	1
2	RBM17	0	0	1	1	1	1
2	RBM22	0	0	0.850963	0.85607	1	1
2	RBM3	0	0	1	1	1	1
2	RBM7	0	0	1	1	1	1
2	RBM8A	0	0	0.83526	0.840892	1	1
2	RBMS1	0	0	1	1	1	1
2	REL	0	0	0.764358	0.773199	1	1
2	RELA	0	0	0.875024	0.879251	1	1
2	RFC2	0	0	1	1	1	1
2	RFX1	1	0	0.231319	0.959161	1	1
2	RFX2	3	0	0.0589824	0.982836	1	1
2	RFX3	0	0	0.993333	0.993542	1	1
2	RFX4	0	0	1	1	1	1
2	RFX4	3	0	0.0689354	0.978104	1	1
2	RFX5	0	1	0.94203	0.267474	1	1
2	RFXANK	0	0	0.979086	0.97974	1	1
2	RFXDC2	1	0	0.365467	0.83026	1	1
2	RHOX11	2	4	0.844578	0.275746	1	1
2	RHOX11	2	4	0.844762	0.275583	1	1
2	RHOX6	4	6	0.926537	0.189112	1	1
2	RIOK2	0	0	1	1	1	1
2	RNASEH2C	0	0	0.928995	0.931277	1	1
2	RNF138	0	0	1	1	1	1
2	RPL35	0	0	1	1	1	1
2	RPL6	0	0	0.864696	0.869213	1	1
2	RPP25	1	0	0.226976	0.961135	1	1
2	RPS10	0	0	1	1	1	1
2	RPS4X	0	0	0.903634	0.906797	1	1
2	RPS6KA5	0	0	1	1	1	1
2	RUFY3	0	0	1	1	1	1
2	RUNX1	0	1	0.960289	0.231547	1	1
2	RUNX2	0	1	0.997341	0.0696548	1	1
2	RUVBL1	0	0	0.96238	0.963598	1	1
2	RXRA	0	0	0.935159	0.937225	1	1
2	RXRA	0	0	0.884755	0.888646	1	1
2	RXRA	5	3	0.205407	0.908266	1	1
2	SCMH1	0	0	1	1	1	1
2	SEMA4A	0	0	0.789316	0.796959	1	1
2	SF1	0	0	1	1	1	1
2	SF3B1	0	0	1	1	1	1
2	SFPI1	0	2	0.958414	0.140167	1	1
2	SFT2D1	0	0	0.746336	0.755929	1	1
2	SHOX2	6	10	0.989192	0.0346212	1	1
2	SIX1	3	1	0.17406	0.934214	1	1
2	SIX2	4	2	0.203656	0.909851	1	1
2	SIX3	4	1	0.096325	0.962694	1	1
2	SIX4	3	0	0.0832926	0.970452	1	1
2	SIX6	6	1	0.0110543	0.996924	1	1
2	SIX6	4	2	0.208182	0.905721	1	1
2	SIX6	5	3	0.213202	0.901012	1	1
2	SLC18A1	0	0	0.844083	0.849401	1	1
2	SMAD2	0	0	1	1	1	1
2	SMAD3	0	0	0.930587	0.932816	1	1
2	SMAD3	0	2	0.907662	0.212475	1	1
2	SMAD4	0	0	0.852762	0.857774	1	1
2	SMUG1	0	0	0.988991	0.989334	1	1
2	SNAPC4	0	0	0.920553	0.923119	1	1
2	SND1	0	0	0.975832	0.976592	1	1
2	SNRPB2	0	0	1	1	1	1
2	SOCS4	0	1	0.999233	0.0382696	1	1
2	SOD1	0	0	1	1	1	1
2	SOX1	0	2	0.94622	0.160773	1	1
2	SOX10	0	1	0.972959	0.198231	1	1
2	SOX11	0	1	0.89841	0.324609	1	1
2	SOX12	0	1	0.902301	0.320491	1	1
2	SOX13	0	0	1	1	1	1
2	SOX13	0	0	0.660527	0.676389	1	1
2	SOX15	0	3	0.982136	0.0617404	1	1
2	SOX17	0	0	0.789972	0.797585	1	1
2	SOX17	0	2	0.979402	0.0950085	1	1
2	SOX18	0	2	0.952398	0.150707	1	1
2	SOX2	0	0	0.959968	0.961238	1	1
2	SOX21	0	1	0.975734	0.189556	1	1
2	SOX3	0	0	0.962406	0.96361	1	1
2	SOX30	0	3	0.974836	0.0769896	1	1
2	SOX4	1	2	0.88354	0.338762	1	1
2	SOX4	0	1	0.908301	0.313981	1	1
2	SOX5	0	0	0.918407	0.921046	1	1
2	SOX5	0	2	0.971805	0.113335	1	1
2	SOX6	0	0	0.95307	0.954581	1	1
2	SOX8	0	2	0.973707	0.10902	1	1
2	SOX9	0	1	0.881148	0.340764	1	1
2	SP1	0	0	0.986159	0.986599	1	1
2	SP100	1	0	0.326168	0.888547	1	1
2	SP2	0	0	0.97371	0.974569	1	1
2	SP4	0	1	0.617821	0.479009	1	1
2	SPAG7	0	0	0.99489	0.99505	1	1
2	SPATS2	0	0	1	1	1	1
2	SPDEF	2	1	0.386882	0.784708	1	1
2	SPIB	0	1	0.98113	0.170325	1	1
2	SPR	0	0	1	1	1	1
2	SPZ1	0	0	0.792142	0.799738	1	1
2	SRBD1	0	0	0.956291	0.957674	1	1
2	SREBF1	0	0	0.99569	0.995826	1	1
2	SREBF2	0	0	0.922097	0.92465	1	1
2	SRF	0	1	0.81592	0.386657	1	1
2	SRF	0	4	0.974523	0.0632183	1	1
2	SRP9	0	0	0.991358	0.991628	1	1
2	SSBP3	0	0	0.982935	0.98347	1	1
2	STAT1	3	1	0.197744	0.915164	1	1
2	STAT3	0	0	0.624307	0.643637	1	1
2	STAT4	0	0	0.629793	0.648712	1	1
2	STAT6	1	0	0.34262	0.867411	1	1
2	STAU2	0	0	0.966292	0.967369	1	1
2	STUB1	0	0	1	1	1	1
2	SUCLG1	0	0	0.85579	0.860688	1	1
2	T	0	0	0.95771	0.959075	1	1
2	TAF9	0	0	1	1	1	1
2	TAGLN2	0	0	1	1	1	1
2	TBP	0	1	0.797651	0.396575	1	1
2	TBP	0	0	0.822704	0.829162	1	1
2	TBPL1	0	0	0.979268	0.979922	1	1
2	TCEAL6	0	0	1	1	1	1
2	TCF12	1	0	0.0926405	0.99509	1	1
2	TCF3	0	0	0.9331	0.935256	1	1
2	TCF3	2	0	0.00375105	0.999885	1	1
2	TCF3	1	1	0.596155	0.620749	1	1
2	TCF7	1	1	0.605436	0.628274	1	1
2	TCFAP2A	9	1	3.0391e-05	0.999996	0.0330114	1
2	TCFAP2B	7	1	0.000341779	0.99995	0.235275	1
2	TCFAP2C	9	2	0.000225879	0.999961	0.178714	1
2	TCFAP2E	5	0	0.0019526	0.999673	0.843661	1
2	TCFCP2L1	3	4	0.76733	0.411743	1	1
2	TEAD1	0	0	0.954396	0.955847	1	1
2	TEAD1	0	0	0.982864	0.983413	1	1
2	TFAM	0	0	1	1	1	1
2	TFAP2A	0	0	0.974578	0.975387	1	1
2	TFAP2A	1	0	0.16428	0.982364	1	1
2	TGIF1	0	0	0.957865	0.95919	1	1
2	TGIF1	3	2	0.40509	0.736032	1	1
2	TGIF2	4	2	0.255566	0.855938	1	1
2	THAP1	3	3	0.625542	0.644521	1	1
2	THRA	0	0	1	1	1	1
2	TIA1	0	0	1	1	1	1
2	TIMELESS	0	0	1	1	1	1
2	TIMM44	0	0	1	1	1	1
2	TITF1	1	1	0.588987	0.614995	1	1
2	TLX2	0	4	0.999987	0.000224157	1	0.100412
2	TOB2	0	0	1	1	1	1
2	TPI1	0	0	1	1	1	1
2	TPPP	0	0	0.893215	0.896743	1	1
2	TRIM21	0	1	0.987346	0.143055	1	1
2	TRIM69	0	0	1	1	1	1
2	TRIP10	0	0	0.896267	0.899688	1	1
2	TRMT1	0	0	1	1	1	1
2	TROVE2	0	0	1	1	1	1
2	TSC22D4	0	0	0.924883	0.927315	1	1
2	TSN	0	0	0.830212	0.836102	1	1
2	TSNAX	0	0	1	1	1	1
2	TULP1	0	0	0.953513	0.954986	1	1
2	U2AF1	0	0	1	1	1	1
2	UBB	0	0	1	1	1	1
2	UBE2V1	0	1	0.960612	0.230777	1	1
2	UGP2	0	0	1	1	1	1
2	UNCX4.1	4	7	0.983027	0.0597218	1	1
2	UQCRB	0	0	0.968252	0.969245	1	1
2	USF1	0	0	1	1	1	1
2	USF1	0	0	0.820631	0.827005	1	1
2	USF2	0	0	0.953668	0.955128	1	1
2	USF2	0	0	0.910787	0.913747	1	1
2	USP39	0	0	0.861502	0.866161	1	1
2	UTP18	0	0	0.879725	0.883696	1	1
2	VAMP3	0	0	0.939182	0.941144	1	1
2	VAX1	3	5	0.890392	0.231595	1	1
2	VAX2	0	0	0.773021	0.781406	1	1
2	VAX2	4	7	0.957416	0.107394	1	1
2	VPS4B	0	0	1	1	1	1
2	VSX1	0	0	0.99686	0.996959	1	1
2	VSX1	5	8	0.984497	0.0562976	1	1
2	WISP2	0	0	1	1	1	1
2	XRCC1	0	0	0.874892	0.87908	1	1
2	YEATS4	0	0	1	1	1	1
2	YWHAE	0	0	0.997611	0.997685	1	1
2	YWHAZ	0	0	1	1	1	1
2	YY1	0	3	0.998423	0.0119402	1	1
2	ZBTB12	0	0	0.957866	0.959205	1	1
2	ZBTB12	1	0	0.384944	0.78919	1	1
2	ZBTB25	0	0	1	1	1	1
2	ZBTB3	3	3	0.584384	0.61161	1	1
2	ZBTB33	0	0	0.856508	0.861561	1	1
2	ZBTB4	0	0	0.881633	0.885576	1	1
2	ZBTB43	0	0	1	1	1	1
2	ZBTB46	0	1	0.992979	0.109658	1	1
2	ZBTB7B	2	0	0.039414	0.995292	1	1
2	ZC3H7A	0	0	0.93788	0.939886	1	1
2	ZCCHC14	0	0	1	1	1	1
2	ZCCHC17	0	0	1	1	1	1
2	ZDHHC15	0	1	0.959441	0.233455	1	1
2	ZDHHC5	0	0	1	1	1	1
2	ZEB1	0	0	0.98301	0.983545	1	1
2	ZFP105	0	0	0.79016	0.798009	1	1
2	ZFP128	0	0	0.607014	0.629578	1	1
2	ZFP161	0	0	0.745214	0.755328	1	1
2	ZFP187	0	5	0.999218	0.00391117	1	0.744603
2	ZFP281	0	0	0.52147	0.576864	1	1
2	ZFP3	0	1	0.968116	0.212088	1	1
2	ZFP410	0	0	0.664854	0.680415	1	1
2	ZFP423	0	0	0.992004	0.992263	1	1
2	ZFP691	2	2	0.579165	0.607733	1	1
2	ZFP740	0	0	0.5203	0.576793	1	1
2	ZFX	1	0	0.182044	0.977514	1	1
2	ZHX3	0	0	0.803177	0.810252	1	1
2	ZIC1	2	1	0.1584	0.9838	1	1
2	ZIC2	3	0	0.00324753	0.999746	1	1
2	ZIC3	3	1	0.0286893	0.997198	1	1
2	ZMAT2	0	0	1	1	1	1
2	ZMAT4	0	0	1	1	1	1
2	ZRSR2	0	0	1	1	1	1
2	ZSWIM1	0	0	0.959447	0.960727	1	1
3	ABCF2	23	35	0.995775	0.00623496	1	1
3	ACO1	0	0	1	1	1	1
3	ADARB1	36	39	0.920928	0.101313	1	1
3	AFF4	0	0	1	1	1	1
3	AGGF1	0	0	1	1	1	1
3	ALX3	440	458	0.999972	3.34627e-05	1	0.0232985
3	ALX4	472	430	0.9673	0.0355807	1	1
3	ANXA1	4	1	0.237753	0.867064	1	1
3	ANXA11	0	0	1	1	1	1
3	APEX2	32	40	0.981584	0.0244758	1	1
3	AR	59	82	0.999769	0.000317881	1	0.134486
3	ARFGAP1	9	10	0.846881	0.195123	1	1
3	ARID3A	338	344	0.999274	0.000846642	1	0.276564
3	ARID3A	0	0	1	1	1	1
3	ARID5A	256	307	1	1.72176e-07	1	0.000395823
3	ARNT	0	0	1	1	1	1
3	ARNTL	29	22	0.311626	0.749418	1	1
3	ARX	426	432	0.999717	0.000328936	1	0.137257
3	ASCC1	0	0	1	1	1	1
3	ASCL2	407	430	1	1.36508e-07	1	0.000353887
3	ASPSCR1	11	23	0.999103	0.00173309	1	0.430074
3	ATF1	496	502	0.999982	2.07503e-05	1	0.0164175
3	ATOH1	6	3	0.374885	0.730973	1	1
3	BARHL1	299	331	0.99999	1.1744e-05	1	0.0105995
3	BARHL2	139	126	0.826393	0.192212	1	1
3	BARX1	511	518	0.999938	7.2358e-05	1	0.0434305
3	BARX1	0	0	1	1	1	1
3	BARX2	312	341	0.999981	2.27698e-05	1	0.0175214
3	BAX	0	0	1	1	1	1
3	BBX	354	393	0.999999	1.37329e-06	1	0.00223103
3	BCL11A	0	0	1	1	1	1
3	BCL6	327	338	0.999875	0.000146552	1	0.0728218
3	BCL6B	686	712	1	1.70529e-07	1	0.000395823
3	BOLL	0	0	1	1	1	1
3	BRCA1	7	7	0.769626	0.295109	1	1
3	BSX	557	593	1	1.35241e-07	1	0.000353887
3	CANX	0	0	1	1	1	1
3	CAT	39	34	0.699285	0.343659	1	1
3	CBFA2T2	15	11	0.561333	0.505953	1	1
3	CBFB	206	213	0.996957	0.00359288	1	0.701555
3	CBX3	2	1	0.590421	0.539856	1	1
3	CBX7	0	0	1	1	1	1
3	CCDC25	37	39	0.904619	0.119308	1	1
3	CDX1	314	337	0.999952	5.76941e-05	1	0.0362354
3	CDX2	334	342	0.999506	0.000578047	1	0.208377
3	CDX2	2	3	0.829161	0.301369	1	1
3	CEBPA	27	20	0.386561	0.674094	1	1
3	CEBPB	32	33	0.87254	0.158241	1	1
3	CEBPG	36	41	0.960218	0.050506	1	1
3	CFL2	0	0	1	1	1	1
3	CLK1	0	0	1	1	1	1
3	CNOT6	9	6	0.461277	0.634202	1	1
3	CPHX	529	569	1	1.4949e-07	1	0.000364289
3	CPSF4	0	0	1	1	1	1
3	CREB1	0	0	1	1	1	1
3	CREB1	34	30	0.753626	0.284527	1	1
3	CREB3L1	0	0	1	1	1	1
3	CRX	17	13	0.495435	0.580334	1	1
3	CRX	379	319	0.868207	0.140152	1	1
3	CSNK2B	0	0	1	1	1	1
3	CSTF2	0	0	1	1	1	1
3	CTCF	159	123	0.861832	0.148771	1	1
3	CUTL1	664	591	0.975792	0.0260377	1	1
3	CUTL1	374	364	0.994236	0.00652607	1	1
3	CYB5R1	0	0	0.790006	0.713267	1	1
3	CYCS	0	0	1	1	1	1
3	DAB2	0	0	1	1	1	1
3	DAZAP1	0	0	1	1	1	1
3	DBX1	122	172	1	5.06394e-08	1	0.000181474
3	DBX2	217	246	0.999962	4.78845e-05	1	0.031368
3	DDX20	18	19	0.86021	0.175496	1	1
3	DDX4	0	0	1	1	1	1
3	DGCR8	7	13	0.983031	0.0302836	1	1
3	DHX36	14	20	0.97925	0.0349059	1	1
3	DIABLO	10	11	0.867968	0.164554	1	1
3	DIS3	0	0	1	1	1	1
3	DLX1	322	352	0.99999	1.27539e-05	1	0.0112608
3	DLX2	457	514	1	1.17284e-08	1	5.84152e-05
3	DLX3	504	529	0.999996	4.55541e-06	1	0.00533701
3	DLX4	507	526	0.999991	1.00865e-05	1	0.00941222
3	DLX5	573	583	0.999993	7.64952e-06	1	0.00773694
3	DLX6	0	0	1	1	1	1
3	DMBX1	376	330	0.885162	0.123144	1	1
3	DNMT3A	0	0	1	1	1	1
3	DTL	3	6	0.945364	0.105332	1	1
3	DUS3L	0	0	1	1	1	1
3	DUSP22	0	0	1	1	1	1
3	DUSP26	0	0	1	1	1	1
3	E2F1	0	0	0.898592	0.86673	1	1
3	E2F2	32	14	0.67608	0.350697	1	1
3	E2F3	0	0	0.69817	0.510834	1	1
3	E2F3	40	21	0.715902	0.307964	1	1
3	E2F4	0	1	0.947278	0.239062	1	1
3	E2F6	0	0	0.750201	0.648938	1	1
3	EBF1	0	0	1	1	1	1
3	EBF1	25	24	0.8611	0.165192	1	1
3	ECSIT	0	0	1	1	1	1
3	EDN1	18	16	0.613851	0.468815	1	1
3	EEF1D	10	10	0.733539	0.3586	1	1
3	EGR1	33	4	0.000367591	0.999786	0.246092	1
3	EGR1	4	0	0.362352	0.725276	1	1
3	EGR2	26	10	0.0462317	0.967162	1	1
3	EHF	268	283	0.999941	6.93605e-05	1	0.0418374
3	EHF	2	0	0.437416	0.693442	1	1
3	EIF5A2	4	7	0.925697	0.122415	1	1
3	ELF1	2	4	0.901226	0.180742	1	1
3	ELF2	0	0	1	1	1	1
3	ELF3	231	230	0.995355	0.0053528	1	0.921195
3	ELF5	84	91	0.986858	0.0160076	1	1
3	ELK1	21	16	0.605646	0.449361	1	1
3	ELK4	13	9	0.56638	0.500213	1	1
3	EMX2	586	622	1	1.47426e-07	1	0.000364289
3	EN1	375	369	0.99706	0.00335216	1	0.666297
3	EN1	177	171	0.977731	0.0253776	1	1
3	EN2	470	511	1	3.13692e-07	1	0.000629669
3	ENO1	0	0	1	1	1	1
3	EOMES	327	311	0.992949	0.00791375	1	1
3	ERG	8	6	0.535418	0.56949	1	1
3	ESR2	452	410	0.998838	0.00128572	1	0.354948
3	ESRRA	558	529	0.999714	0.00031976	1	0.134812
3	ESRRA	2	5	0.947118	0.103531	1	1
3	ESRRA	107	97	0.929249	0.0795483	1	1
3	ESRRB	418	384	0.99846	0.00171016	1	0.425251
3	ESX1	315	322	0.998733	0.00148534	1	0.39381
3	ESX1	0	0	1	1	1	1
3	ETFB	0	0	1	1	1	1
3	ETS1	0	0	1	1	1	1
3	ETS1	16	10	0.46238	0.600511	1	1
3	ETV4	0	0	1	1	1	1
3	EVX1	555	619	1	1.19337e-09	1	9.08778e-06
3	EVX1	0	0	1	1	1	1
3	EVX2	613	620	0.999992	8.76845e-06	1	0.008616
3	EWSR1	5	3	0.475604	0.645797	1	1
3	FEV	11	17	0.97582	0.0387644	1	1
3	FEZ1	0	0	1	1	1	1
3	FEZF2	4	3	0.64777	0.450091	1	1
3	FHL2	0	1	0.819354	0.296863	1	1
3	FIP1L1	38	41	0.932475	0.0844022	1	1
3	FLI1	1	0	0.464424	0.75401	1	1
3	FLI1	9	5	0.290306	0.79815	1	1
3	FOS	43	33	0.37237	0.676933	1	1
3	FOSL1	9	9	0.749267	0.329454	1	1
3	FOSL1	36	32	0.687509	0.361049	1	1
3	FOSL2	58	57	0.890824	0.128894	1	1
3	FOXA1	73	82	0.986997	0.0166911	1	1
3	FOXA2	67	77	0.989878	0.013142	1	1
3	FOXA2	191	185	0.965659	0.0391288	1	1
3	FOXC1	34	52	0.999496	0.000767481	1	0.259039
3	FOXD1	1	2	0.855234	0.301796	1	1
3	FOXD3	21	28	0.980582	0.0298127	1	1
3	FOXF2	2	3	0.849813	0.302487	1	1
3	FOXH1	6	6	0.697265	0.482049	1	1
3	FOXI1	15	19	0.94511	0.085832	1	1
3	FOXJ1	161	172	0.997376	0.00316675	1	0.640898
3	FOXJ3	152	159	0.994246	0.0068547	1	1
3	FOXK1	142	149	0.993223	0.00809825	1	1
3	FOXL1	66	39	0.0495217	0.960503	1	1
3	FOXL1	121	126	0.982873	0.0205619	1	1
3	FOXM1	32	35	0.927714	0.0911502	1	1
3	FOXN3	9	5	0.443547	0.638223	1	1
3	FOXO1	26	22	0.6113	0.448851	1	1
3	FOXP1	14	14	0.761223	0.309327	1	1
3	FOXP2	12	13	0.814311	0.257544	1	1
3	FOXP4	0	1	0.917505	0.272202	1	1
3	FOXQ1	16	14	0.582427	0.509082	1	1
3	GABPA	262	260	0.998927	0.00123111	1	0.344045
3	GABPA	15	13	0.77187	0.270769	1	1
3	GADD45A	0	0	1	1	1	1
3	GATA1	6	9	0.941264	0.109371	1	1
3	GATA2	31	28	0.638746	0.424654	1	1
3	GATA3	0	0	1	1	1	1
3	GATA4	8	11	0.916273	0.12776	1	1
3	GATA5	312	269	0.729573	0.286653	1	1
3	GATA6	305	290	0.98278	0.0192935	1	1
3	GBX1	368	446	1	1.14243e-10	1	1.15999e-06
3	GBX2	558	605	1	2.62752e-08	1	0.000106716
3	GCM1	157	124	0.831293	0.181567	1	1
3	GFI1	50	48	0.854979	0.170188	1	1
3	GFI1B	83	71	0.75882	0.266496	1	1
3	GIT2	20	20	0.79917	0.251454	1	1
3	GLIS2	178	32	1.84417e-14	1	4.88481e-11	1
3	GM397	698	725	1	1.19857e-08	1	5.84152e-05
3	GMEB1	167	127	0.686249	0.332144	1	1
3	GOT1	0	0	1	1	1	1
3	GPAM	0	0	1	1	1	1
3	GPD1	0	0	1	1	1	1
3	GRHL1	6	10	0.97676	0.0511205	1	1
3	GRHPR	0	0	1	1	1	1
3	GSC	348	318	0.96601	0.0372981	1	1
3	GTF2B	19	16	0.618415	0.448837	1	1
3	GTF2H3	0	0	1	1	1	1
3	GTF3C2	0	0	1	1	1	1
3	GTPBP1	0	0	1	1	1	1
3	GTPBP6	41	35	0.626101	0.422288	1	1
3	H1FX	14	9	0.338636	0.737523	1	1
3	H2AFY	27	34	0.977137	0.029182	1	1
3	H2AFZ	6	4	0.51892	0.590653	1	1
3	HBP1	356	404	1	1.65298e-07	1	0.000394913
3	HCFC2	12	11	0.75607	0.298135	1	1
3	HCLS1	3	2	0.532364	0.638161	1	1
3	HDAC8	0	0	1	1	1	1
3	HDX	472	454	0.99832	0.00188878	1	0.451249
3	HES5	6	0	0.0660079	0.966548	1	1
3	HHAT	0	0	1	1	1	1
3	HHEX	60	49	0.463501	0.581552	1	1
3	HIC1	254	228	0.985415	0.0161465	1	1
3	HIST1H2BN	0	0	0.697813	0.507131	1	1
3	HIST2H2AB	80	71	0.759142	0.269028	1	1
3	HIST2H2BE	8	7	0.681177	0.401163	1	1
3	HLCS	0	0	1	1	1	1
3	HLF	171	159	0.870611	0.144093	1	1
3	HLTF	75	57	0.280852	0.752922	1	1
3	HMBOX1	509	506	0.999709	0.000333381	1	0.137697
3	HMG20A	0	0	1	1	1	1
3	HMX1	435	457	0.999991	1.09628e-05	1	0.0100432
3	HMX2	306	333	0.999976	2.90722e-05	1	0.0212112
3	HMX3	307	317	0.999419	0.000684547	1	0.237295
3	HNF1A	91	102	0.993519	0.00817091	1	1
3	HNF1B	0	6	0.999767	0.00112364	1	0.3252
3	HNF4A	428	414	0.999887	0.00012764	1	0.0658992
3	HNF4A	367	320	0.988348	0.0127301	1	1
3	HNF4G	438	425	0.999888	0.000126871	1	0.0657805
3	HNRNPA1	49	51	0.925715	0.0908729	1	1
3	HNRNPC	17	19	0.876572	0.164016	1	1
3	HOMEZ	325	287	0.821054	0.191673	1	1
3	HOXA1	407	419	0.999914	0.000100911	1	0.0548902
3	HOXA10	218	240	0.999804	0.0002425	1	0.107444
3	HOXA11	358	403	1	3.46401e-07	1	0.000659483
3	HOXA13	464	459	0.999489	0.000584254	1	0.209376
3	HOXA2	503	524	0.999993	8.55795e-06	1	0.00847752
3	HOXA3	461	455	0.999189	0.000925017	1	0.293878
3	HOXA3	459	449	0.998753	0.00141523	1	0.380656
3	HOXA4	287	293	0.998584	0.00165551	1	0.4161
3	HOXA5	479	496	0.999981	2.2203e-05	1	0.0172867
3	HOXA5	147	155	0.99365	0.0076364	1	1
3	HOXA6	410	414	0.999538	0.000535408	1	0.195318
3	HOXA7	468	494	0.999995	5.44462e-06	1	0.00614254
3	HOXA7	470	485	0.999973	3.12114e-05	1	0.02211
3	HOXA9	309	312	0.998431	0.00182109	1	0.441436
3	HOXA9	32	37	0.960064	0.0507375	1	1
3	HOXB13	3	1	0.263455	0.880121	1	1
3	HOXB13	149	137	0.874272	0.140055	1	1
3	HOXB3	558	614	1	4.18849e-09	1	2.4403e-05
3	HOXB4	321	316	0.996536	0.003957	1	0.747929
3	HOXB5	482	499	0.999974	3.01023e-05	1	0.0218181
3	HOXB6	517	571	1	2.02842e-08	1	8.82681e-05
3	HOXB7	371	389	0.999929	8.43904e-05	1	0.0489641
3	HOXB8	332	363	0.999992	9.85844e-06	1	0.00939305
3	HOXB9	216	234	0.999726	0.000331528	1	0.137397
3	HOXB9	0	0	1	1	1	1
3	HOXC10	438	455	0.99998	2.33851e-05	1	0.0176977
3	HOXC11	363	395	0.999996	5.04741e-06	1	0.00574763
3	HOXC12	461	460	0.999743	0.000295232	1	0.12711
3	HOXC13	410	392	0.992536	0.0083554	1	1
3	HOXC4	304	305	0.997755	0.00259501	1	0.560346
3	HOXC5	342	341	0.997899	0.00241806	1	0.534964
3	HOXC6	310	329	0.999842	0.00019046	1	0.0889134
3	HOXC8	319	358	0.999998	2.23252e-06	1	0.00309113
3	HOXC9	476	471	0.999649	0.000401488	1	0.158314
3	HOXC9	121	121	0.967508	0.0379612	1	1
3	HOXD1	564	583	0.999996	4.96278e-06	1	0.00571476
3	HOXD10	187	191	0.991196	0.0103675	1	1
3	HOXD11	421	453	0.999998	2.0643e-06	1	0.00290882
3	HOXD12	459	463	0.999871	0.000148684	1	0.0728218
3	HOXD13	191	191	0.981351	0.0216859	1	1
3	HOXD3	469	528	1	5.48802e-09	1	3.03947e-05
3	HOXD3	13	12	0.661943	0.429054	1	1
3	HOXD8	174	211	0.999995	7.29092e-06	1	0.00758869
3	HP1BP3	14	9	0.338636	0.737523	1	1
3	HSF1	268	261	0.996746	0.00370473	1	0.714239
3	HSF1	121	121	0.967089	0.0384553	1	1
3	HSPA1L	0	0	1	1	1	1
3	HSPA5	0	0	0.809455	0.742327	1	1
3	ID2	0	0	1	1	1	1
3	ING3	29	29	0.862797	0.166235	1	1
3	INSM1	15	24	0.987689	0.0176118	1	1
3	INSM1	5	4	0.764619	0.286946	1	1
3	IRF1	0	0	1	1	1	1
3	IRF2	0	0	0.708782	0.559974	1	1
3	IRF3	145	121	0.654344	0.370211	1	1
3	IRF4	305	263	0.78453	0.229491	1	1
3	IRF5	211	176	0.682693	0.336971	1	1
3	IRF6	19	16	0.644508	0.417787	1	1
3	IRF6	271	254	0.977238	0.0253988	1	1
3	IRX2	393	465	1	5.68999e-10	1	4.62194e-06
3	IRX3	423	559	1	3.09007e-18	1	1.25502e-13
3	IRX3	381	500	1	4.91376e-16	1	1.19743e-11
3	IRX4	338	456	1	2.76016e-16	1	8.40771e-12
3	IRX5	427	536	1	1.59961e-14	1	3.24838e-10
3	IRX6	357	455	1	2.24261e-13	1	3.90356e-09
3	ISGF3G	188	165	0.751147	0.268859	1	1
3	ISL2	219	228	0.997544	0.00292194	1	0.607545
3	ISX	600	605	0.999986	1.56361e-05	1	0.0130491
3	IVD	0	0	1	1	1	1
3	JUN	43	36	0.650663	0.392089	1	1
3	JUNB	37	33	0.636678	0.419686	1	1
3	JUNDM2	516	524	0.99999	1.2142e-05	1	0.0107988
3	KCNIP1	26	22	0.695134	0.352239	1	1
3	KIF22	0	0	1	1	1	1
3	KLF1	0	0	0.700068	0.454581	1	1
3	KLF3	45	43	0.771828	0.270816	1	1
3	KLF4	0	0	1	1	1	1
3	KLF4	1	0	0.64695	0.451328	1	1
3	KLF5	0	0	0.71119	0.410999	1	1
3	KLF7	30	8	0.216345	0.811082	1	1
3	LARP1	9	8	0.698591	0.376493	1	1
3	LARP4	83	98	0.99764	0.00303512	1	0.621532
3	LAS1L	0	0	1	1	1	1
3	LBX2	484	516	0.999999	1.51341e-06	1	0.00236651
3	LEF1	403	415	0.999953	5.5507e-05	1	0.035225
3	LHX1	176	176	0.980966	0.022137	1	1
3	LHX2	436	457	0.999981	2.29969e-05	1	0.0175214
3	LHX2	0	0	1	1	1	1
3	LHX3	134	152	0.999085	0.00115817	1	0.329711
3	LHX3	2	1	0.446618	0.781628	1	1
3	LHX4	487	510	0.999994	7.18395e-06	1	0.00754587
3	LHX4	0	0	1	1	1	1
3	LHX5	170	174	0.989475	0.0124217	1	1
3	LHX6	440	464	0.999992	1.00074e-05	1	0.00941222
3	LHX6	595	560	0.997471	0.00280188	1	0.591667
3	LHX8	597	596	0.999987	1.51896e-05	1	0.0128525
3	LHX9	349	359	0.999699	0.000353452	1	0.144154
3	LMX1A	176	183	0.994187	0.00692603	1	1
3	LMX1B	118	119	0.9628	0.0438396	1	1
3	LSM6	0	0	1	1	1	1
3	MAFB	727	796	1	2.30669e-11	1	3.5132e-07
3	MAFB	77	90	0.998025	0.00240693	1	0.534691
3	MAFF	351	395	1	3.15238e-07	1	0.000629669
3	MAFK	642	708	1	2.73891e-10	1	2.56707e-06
3	MAFK	111	133	0.99966	0.000437966	1	0.168522
3	MAGEA8	14	9	0.338636	0.737523	1	1
3	MAGOH	6	7	0.813618	0.259766	1	1
3	MAP4K2	31	31	0.844219	0.190276	1	1
3	MAPK1	0	0	1	1	1	1
3	MAX	3	9	0.984377	0.0285413	1	1
3	MAX	329	277	0.945536	0.0586841	1	1
3	MBTPS2	8	6	0.538493	0.565536	1	1
3	MCTP2	0	0	1	1	1	1
3	MDM2	7	5	0.502707	0.611382	1	1
3	MECP2	0	0	1	1	1	1
3	MEF2A	74	64	0.659343	0.376542	1	1
3	MEF2C	71	66	0.818504	0.207656	1	1
3	MEIS1	656	700	1	2.04923e-09	1	1.31414e-05
3	MEIS1	65	64	0.941637	0.0681888	1	1
3	MEOX1	541	569	0.999999	8.522e-07	1	0.00146247
3	MEX3C	18	18	0.744996	0.337011	1	1
3	MLX	2	4	0.882492	0.188944	1	1
3	MORN1	0	0	1	1	1	1
3	MRG2	661	685	1	6.93215e-08	1	0.000241326
3	MRPL1	41	43	0.935181	0.0785389	1	1
3	MRPL2	13	13	0.775253	0.286486	1	1
3	MRPS25	33	32	0.789957	0.254201	1	1
3	MSI1	23	17	0.492104	0.568719	1	1
3	MSI2	0	0	1	1	1	1
3	MSRA	0	0	1	1	1	1
3	MSRB3	0	0	1	1	1	1
3	MSX1	275	280	0.99746	0.00297143	1	0.613645
3	MSX2	531	570	1	1.89468e-07	1	0.000419738
3	MSX3	197	202	0.993297	0.00790899	1	1
3	MTF1	323	278	0.979064	0.0228133	1	1
3	MTHFD1	0	0	1	1	1	1
3	MXD4	15	18	0.91659	0.108377	1	1
3	MYB	22	28	0.965875	0.0460169	1	1
3	MYB	460	409	0.959323	0.0439635	1	1
3	MYBL1	471	420	0.966628	0.0361261	1	1
3	MYC	12	17	0.953562	0.0647264	1	1
3	MYCN	1	0	0.439188	0.79255	1	1
3	MYEF2	0	0	1	1	1	1
3	MYF6	498	491	0.999993	7.82363e-06	1	0.00781363
3	MYF6	55	46	0.709363	0.323686	1	1
3	MYLK	0	0	1	1	1	1
3	MYOD1	10	10	0.755317	0.319085	1	1
3	MYOD1	30	23	0.655062	0.387246	1	1
3	MYOG	10	8	0.633467	0.443209	1	1
3	NANOS1	0	0	1	1	1	1
3	NAP1L1	0	0	1	1	1	1
3	NCALD	0	0	0.718402	0.585841	1	1
3	NCBP2	0	0	1	1	1	1
3	NELFB	4	6	0.892249	0.185564	1	1
3	NFATC2	40	28	0.368745	0.675623	1	1
3	NFATC3	0	0	1	1	1	1
3	NFATC4	0	0	1	1	1	1
3	NFE2L2	89	84	0.897053	0.117768	1	1
3	NFIB	0	0	1	1	1	1
3	NFIC	361	361	0.999967	3.78119e-05	1	0.0254755
3	NFIL3	0	0	1	1	1	1
3	NFIL3	29	28	0.755415	0.299003	1	1
3	NFIX	0	0	1	1	1	1
3	NFKB1	131	121	0.957684	0.0476819	1	1
3	NFYA	236	260	0.999978	2.62726e-05	1	0.019639
3	NFYB	3	4	0.810688	0.277675	1	1
3	NHLH1	51	44	0.889642	0.125068	1	1
3	NKX1-2	518	561	1	1.20332e-07	1	0.000333222
3	NKX2-2	583	573	0.999946	6.12288e-05	1	0.0378699
3	NKX2-3	589	615	1	2.82892e-07	1	0.000594288
3	NKX2-3	78	85	0.982204	0.0220555	1	1
3	NKX2-4	343	350	0.999822	0.000207148	1	0.094531
3	NKX2-5	455	454	0.999903	0.00011086	1	0.0587287
3	NKX2-5	49	43	0.636098	0.411201	1	1
3	NKX2-6	310	309	0.998783	0.00139913	1	0.378595
3	NKX2-9	554	601	1	2.37516e-08	1	9.97928e-05
3	NKX3-1	547	585	1	1.44166e-07	1	0.000364289
3	NKX3-1	67	77	0.989665	0.0135531	1	1
3	NKX3-1	462	429	0.986162	0.0152359	1	1
3	NKX3-2	47	39	0.627771	0.414613	1	1
3	NKX6-1	295	309	0.99959	0.000488794	1	0.183251
3	NKX6-1	289	287	0.99562	0.0050352	1	0.884753
3	NKX6-3	269	282	0.999419	0.000692265	1	0.238272
3	NME1	10	12	0.872931	0.186978	1	1
3	NMI	58	63	0.968261	0.0391864	1	1
3	NMRAL1	0	0	1	1	1	1
3	NNT	0	0	1	1	1	1
3	NOBOX	69	51	0.317391	0.717315	1	1
3	NONO	6	7	0.825975	0.230654	1	1
3	NR2C2	7278	28	0	1	0	1
3	NR2E3	20	23	0.913039	0.114863	1	1
3	NR2F1	0	0	1	1	1	1
3	NR2F1	33	37	0.952976	0.0584175	1	1
3	NR2F2	434	407	0.9984	0.00178529	1	0.438998
3	NR4A1	56	75	0.99927	0.00100376	1	0.308067
3	NR4A2	14	6	0.203689	0.846934	1	1
3	NR4A2	23	32	0.987197	0.0180369	1	1
3	NR5A2	151	140	0.970722	0.0329626	1	1
3	NRF1	0	1	0.818071	0.295812	1	1
3	NRL	0	0	1	1	1	1
3	NUCB1	9	7	0.533185	0.572351	1	1
3	NUP107	32	31	0.837674	0.194085	1	1
3	NUP133	0	0	1	1	1	1
3	NXPH3	5	4	0.744228	0.31378	1	1
3	OBOX1	337	285	0.779848	0.233159	1	1
3	OBOX3	402	333	0.712804	0.300855	1	1
3	OBOX5	381	343	0.945225	0.0594993	1	1
3	OBOX5	320	274	0.766672	0.247599	1	1
3	OBOX6	349	336	0.994257	0.00647455	1	1
3	ODC1	0	0	1	1	1	1
3	OLIG1	11	10	0.738526	0.321373	1	1
3	OLIG3	57	49	0.672808	0.365432	1	1
3	OSR1	416	443	0.999999	7.98015e-07	1	0.00138905
3	OSR2	399	457	1	1.82368e-09	1	1.23447e-05
3	OTP	309	291	0.973071	0.0299817	1	1
3	OTUD4	0	0	1	1	1	1
3	OTX1	181	157	0.792177	0.224983	1	1
3	OTX2	394	357	0.954534	0.0495033	1	1
3	P4HB	0	0	1	1	1	1
3	PAX2	465	454	0.999689	0.00035334	1	0.144154
3	PAX3	43	39	0.768928	0.266801	1	1
3	PAX4	444	439	0.999189	0.000926178	1	0.293878
3	PAX5	101	100	0.989615	0.0119959	1	1
3	PAX6	253	265	0.999061	0.00111994	1	0.3252
3	PAX6	126	117	0.928856	0.0802117	1	1
3	PAX7	439	447	0.999887	0.000131037	1	0.0670846
3	PAXIP1	15	19	0.940763	0.0765348	1	1
3	PBX1	277	311	0.999994	7.34927e-06	1	0.00758869
3	PBX1	2	2	0.700033	0.524763	1	1
3	PCK2	3	0	0.24725	0.858632	1	1
3	PDCD11	16	13	0.659131	0.40038	1	1
3	PDE6H	10	10	0.77108	0.292864	1	1
3	PDLIM5	0	0	1	1	1	1
3	PDS5A	2	1	0.649882	0.446929	1	1
3	PDX1	47	46	0.866634	0.158413	1	1
3	PGAM2	0	0	1	1	1	1
3	PHLDA2	0	0	1	1	1	1
3	PHOX2A	462	460	0.999528	0.000540978	1	0.196761
3	PHOX2A	0	0	1	1	1	1
3	PHOX2B	314	302	0.987354	0.0142491	1	1
3	PHTF1	0	0	1	1	1	1
3	PICK1	37	54	0.999188	0.00120973	1	0.339589
3	PIK3C3	0	0	1	1	1	1
3	PIR	0	0	1	1	1	1
3	PITX1	13	9	0.577991	0.486969	1	1
3	PITX1	332	262	0.461872	0.555493	1	1
3	PITX2	349	307	0.878567	0.130434	1	1
3	PITX3	264	187	0.350396	0.66566	1	1
3	PKNOX1	578	634	1	3.65115e-10	1	3.17765e-06
3	PKNOX2	533	554	1	1.07784e-07	1	0.000312687
3	PKNOX2	0	0	1	1	1	1
3	PLAG1	1	0	0.393707	0.85097	1	1
3	PLAGL1	0	0	1	1	1	1
3	PLAGL1	24	3	0.422673	0.609795	1	1
3	PLG	0	0	1	1	1	1
3	POLE3	25	19	0.519319	0.539364	1	1
3	POLI	0	0	1	1	1	1
3	POU1F1	175	166	0.917198	0.0932921	1	1
3	POU2F1	164	174	0.995976	0.00486776	1	0.867115
3	POU2F2	484	503	0.999986	1.59326e-05	1	0.0132061
3	POU2F2	64	66	0.934618	0.0792575	1	1
3	POU2F3	337	334	0.996495	0.00401904	1	0.75547
3	POU3F1	137	142	0.985044	0.017891	1	1
3	POU3F2	236	246	0.998242	0.00209315	1	0.486554
3	POU3F2	41	41	0.873499	0.152616	1	1
3	POU3F3	367	382	0.999818	0.000216315	1	0.0976172
3	POU3F4	143	134	0.873818	0.141827	1	1
3	POU4F3	0	0	1	1	1	1
3	POU4F3	230	232	0.992881	0.0082944	1	1
3	POU6F1	468	466	0.999789	0.000242023	1	0.107444
3	POU6F1	371	368	0.998973	0.00117688	1	0.332706
3	PPP1R10	0	0	1	1	1	1
3	PPP5C	57	57	0.924675	0.0891798	1	1
3	PQBP1	65	62	0.873608	0.146608	1	1
3	PRDM1	41	37	0.710068	0.334965	1	1
3	PRDX5	0	0	1	1	1	1
3	PRKRIR	1	3	0.943016	0.144766	1	1
3	PRNP	0	0	1	1	1	1
3	PROP1	169	158	0.919178	0.0905688	1	1
3	PRRX1	19	14	0.399476	0.674434	1	1
3	PRRX1	355	334	0.976044	0.0265885	1	1
3	PRRX2	434	460	0.999992	9.5211e-06	1	0.00928071
3	PRRX2	0	0	1	1	1	1
3	PSMA6	28	36	0.982066	0.0249401	1	1
3	PSMC2	16	13	0.713454	0.335759	1	1
3	PTCD1	15	16	0.835015	0.213934	1	1
3	PTPMT1	0	0	1	1	1	1
3	PURG	7	3	0.359007	0.728759	1	1
3	R3HDM2	0	0	1	1	1	1
3	RAB14	1	0	0.439105	0.792669	1	1
3	RAB18	0	0	1	1	1	1
3	RAN	3	4	0.822273	0.298719	1	1
3	RARA	532	525	0.999982	2.00657e-05	1	0.0160848
3	RARA	0	0	1	1	1	1
3	RARB	0	0	1	1	1	1
3	RARG	0	0	1	1	1	1
3	RAX	384	377	0.998273	0.00196638	1	0.464767
3	RAX	10	15	0.961106	0.0599976	1	1
3	RBBP5	0	0	1	1	1	1
3	RBBP9	0	0	1	1	1	1
3	RBM17	0	0	1	1	1	1
3	RBM22	40	40	0.869791	0.15732	1	1
3	RBM3	0	0	1	1	1	1
3	RBM7	0	0	1	1	1	1
3	RBM8A	36	33	0.802348	0.23046	1	1
3	RBMS1	0	0	1	1	1	1
[truncated: 119,845 more rows]

## Sheet: Limb-Associated Genes
Limb associated genes and transcription factors.
ACO1
ADARB1
AFF4
AGGF1
ALX1
ALX3
ALX4
ANXA1
ANXA11
APEX2
AR
ARFGAP1
ARID3A
ARID5A
ARNT
ARNTL
ARX
ASCC1
ASCL2
ASPSCR1
ATF1
ATF4
ATF7
ATOH1
AVEN
BAD
BARHL1
BARHL2
BARX1
BARX2
BAX
BBX
BCL11A
BCL6
BCL6B
BHLHB2
BHLHB3
BOLL
BRCA1
BSX
CANX
CAT
CBFA2T2
CBFB
CBX3
CBX7
CCDC25
CDX1
CDX2
CEBPA
CEBPB
CEBPD
CEBPE
CEBPG
CENPB
CFL2
CLK1
CLOCK
CNOT6
CPEB1
CPHX
CPSF4
CREB1
CREB3
CREB3L1
CREB3L2
CREB5
CRX
CSNK2B
CSTF2
CTCF
CUTL1
CYB5R1
CYCS
DAB2
DAZAP1
DBP
DBX1
DBX2
DDX20
DDX4
DGCR8
DHX36
DIABLO
DIS3
DLX1
DLX2
DLX3
DLX4
DLX5
DLX6
DMBX1
DNMT3A
DTL
DUS3L
DUSP22
DUSP26
E2F1
E2F2
E2F3
E2F4
E2F6
E2F7
E2F8
EBF1
ECSIT
EDN1
EEF1D
EGR1
EGR2
EGR3
EGR4
EHF
EIF5A2
ELF1
ELF2
ELF3
ELF4
ELF5
ELK1
ELK3
ELK4
EMX1
EMX2
EN1
EN2
ENO1
EOMES
ERF
ERG
ESR1
ESR2
ESRRA
ESRRB
ESRRG
ESX1
ETFB
ETS1
ETV1
ETV2
ETV3
ETV4
ETV5
ETV6
EVX1
EVX2
EWSR1
EXOSC3
FEV
FEZ1
FEZF2
FHL2
FIGLA
FIP1L1
FLI1
FOS
FOSL1
FOSL2
FOXA1
FOXA2
FOXB1
FOXC1
FOXC2
FOXD1
FOXD2
FOXD3
FOXF2
FOXG1
FOXH1
FOXI1
FOXJ1
FOXJ2
FOXJ3
FOXK1
FOXL1
FOXM1
FOXN3
FOXO1
FOXO4
FOXO6
FOXP1
FOXP2
FOXP3
FOXP4
FOXQ1
GABPA
GADD45A
GATA1
GATA2
GATA3
GATA4
GATA5
GATA6
GBX1
GBX2
GCM1
GCM2
GFI1
GFI1B
GIT2
GLI2
GLIS1
GLIS2
GLIS3
GM397
GMEB1
GMEB2
GOT1
GPAM
GPD1
GRHL1
GRHPR
GSC
GSX1
GSX2
GTF2B
GTF2H3
GTF3C2
GTF3C5
GTPBP1
GTPBP6
H1FX
H2AFY
H2AFZ
HBP1
HCFC2
HCLS1
HDAC8
HDX
HES5
HES7
HESX1
HEY1
HEY2
HHAT
HHEX
HIC1
HIC2
HIRIP3
HIST1H2BN
HIST2H2AB
HIST2H2BE
HLCS
HLF
HLTF
HMBOX1
HMG20A
HMX1
HMX2
HMX3
HNF1A
HNF1B
HNF4A
HNF4G
HNRNPA1
HNRNPC
HOMEZ
HOXA1
HOXA10
HOXA11
HOXA13
HOXA2
HOXA3
HOXA4
HOXA5
HOXA6
HOXA7
HOXA9
HOXB13
HOXB2
HOXB3
HOXB4
HOXB5
HOXB6
HOXB7
HOXB8
HOXB9
HOXC10
HOXC11
HOXC12
HOXC13
HOXC4
HOXC5
HOXC6
HOXC8
HOXC9
HOXD1
HOXD10
HOXD11
HOXD12
HOXD13
HOXD3
HOXD8
HOXD9
HP1BP3
HSF1
HSF2
HSF4
HSFY2
HSPA1L
HSPA5
HTATIP2
ID2
ID4
IL24
ING3
INSM1
IRF1
IRF2
IRF3
IRF4
IRF5
IRF6
IRF7
IRF8
IRX2
IRX3
IRX4
IRX5
IRX6
ISGF3G
ISL2
ISX
IVD
JUN
JUNB
JUNDM2
KCNIP1
KIF22
KLF1
KLF12
KLF13
KLF16
KLF3
KLF4
KLF5
KLF7
LARP1
LARP4
LAS1L
LBX2
LEF1
LHX1
LHX2
LHX3
LHX4
LHX5
LHX6
LHX8
LHX9
LMX1A
LMX1B
LRRFIP1
LSM6
LUZP1
LUZP2
MAFB
MAFF
MAFG
MAFK
MAGEA8
MAGOH
MAP4K2
MAPK1
MAX
MBTPS2
MCTP2
MDM2
MECP2
MED30
MEF2A
MEF2B
MEF2C
MEF2D
MEIS1
MEIS2
MEOX1
MEOX2
MESP1
MEX3C
MGA
MIXL1
MLX
MLXIPL
MNT
MNX1
MORN1
MRG2
MRPL1
MRPL2
MRPS25
MSC
MSI1
MSI2
MSRA
MSRB3
MSX1
MSX2
MSX3
MTF1
MTHFD1
MXD4
MYB
MYBL1
MYBL2
MYC
MYCN
MYEF2
MYF6
MYLK
MYOD1
MYOG
NANOS1
NAP1L1
NCALD
NCBP2
NELFB
NEUROD2
NEUROG2
NFAT5
NFATC1
NFATC2
NFATC3
NFATC4
NFE2
NFE2L2
NFIA
NFIB
NFIC
NFIL3
NFIX
NFKB1
NFKB2
NFYA
NFYB
NHLH1
NKX1-2
NKX2-2
NKX2-3
NKX2-4
NKX2-5
NKX2-6
NKX2-9
NKX3-1
NKX3-2
NKX6-1
NKX6-2
NKX6-3
NME1
NMI
NMRAL1
NNT
NOBOX
NONO
NOTO
NR2C2
NR2E1
NR2E3
NR2F1
NR2F2
NR2F6
NR3C1
NR3C2
NR4A1
NR4A2
NR5A2
NRF1
NRL
NUCB1
NUP107
NUP133
NXPH3
OBOX1
OBOX3
OBOX5
OBOX6
ODC1
OLIG1
OLIG2
OLIG3
ONECUT1
ONECUT2
ONECUT3
OSR1
OSR2
OTP
OTUD4
OTX1
OTX2
P4HB
PAX1
PAX2
PAX3
PAX4
PAX5
PAX6
PAX7
PAX9
PAXIP1
PBX1
PCK2
PDCD11
PDE6H
PDLIM5
PDS5A
PDX1
PGAM2
PHLDA2
PHOX2A
PHOX2B
PHTF1
PICK1
PIK3C3
PIR
PITX1
PITX2
PITX3
PKNOX1
PKNOX2
PLAG1
PLAGL1
PLG
POLE3
POLI
POU1F1
POU2F1
POU2F2
POU2F3
POU3F1
POU3F2
POU3F3
POU3F4
POU4F1
POU4F2
POU4F3
POU6F1
POU6F2
PPARG
PPP1R10
PPP5C
PQBP1
PRDM1
PRDM4
PRDX5
PRKRIR
PRNP
PROP1
PROX1
PRRX1
PRRX2
PSMA6
PSMC2
PTCD1
PTPMT1
PURG
R3HDM2
RAB14
RAB18
RAN
RARA
RARB
RARG
RAX
RBBP5
RBBP9
RBM17
RBM22
RBM3
RBM7
RBM8A
RBMS1
REL
RELA
REST
RFC2
RFC3
RFX1
RFX2
RFX3
RFX4
RFX5
RFXANK
RFXDC2
RHOX11
RHOX6
RIOK2
RNASEH2C
RNF138
RORA
RPL35
RPL6
RPP25
RPS10
RPS4X
RPS6KA5
RREB1
RUFY3
RUNX1
RUNX2
RUNX3
RUVBL1
RXRA
RXRB
RXRG
SCMH1
SCRT1
SEMA4A
SF1
SF3B1
SFPI1
SFT2D1
SHOX
SHOX2
SIX1
SIX2
SIX3
SIX4
SIX6
SLC18A1
SMAD2
SMAD3
SMAD4
SMCR7L
SMPX
SMUG1
SNAI2
SNAPC4
SNAPC5
SND1
SNRPB2
SOCS4
SOD1
SOX1
SOX10
SOX11
SOX12
SOX13
SOX15
SOX17
SOX18
SOX2
SOX21
SOX3
SOX30
SOX4
SOX5
SOX6
SOX7
SOX8
SOX9
SP1
SP100
SP2
SP3
SP4
SP8
SPAG7
SPATS2
SPDEF
SPIB
SPIC
SPR
SPZ1
SRBD1
SREBF1
SREBF2
SRF
SRP9
SSBP3
STAT1
STAT3
STAT4
STAT6
STAU2
STUB1
SUCLG1
T
TAF9
TAGLN2
TBP
TBPL1
TBR1
TBX1
TBX15
TBX19
TBX2
TBX20
TBX21
TBX4
TBX5
TCEAL6
TCF12
TCF21
TCF3
TCF4
TCF7
TCFAP2A
TCFAP2B
TCFAP2C
TCFAP2E
TCFCP2L1
TEAD1
TEAD3
TEAD4
TEF
TFAM
TFAP2A
TFAP2B
TGIF1
TGIF2
THAP1
THRA
THRB
TIA1
TIMELESS
TIMM44
TITF1
TLX2
TOB2
TP63
TPI1
TPPP
TRIM21
TRIM69
TRIP10
TRMT1
TROVE2
TRP53
TRP73
TSC22D4
TSN
TSNAX
TULP1
U2AF1
UBB
UBE2V1
UGP2
UNCX4.1
UQCRB
USF1
USF2
USP39
UTP18
VAMP3
VAX1
VAX2
VDR
VPS4B
VSX1
VSX2
WISP2
XBP1
XRCC1
YEATS4
YWHAE
YWHAZ
YY1
ZBTB12
ZBTB25
ZBTB3
ZBTB33
ZBTB4
ZBTB43
ZBTB46
ZBTB7A
ZBTB7B
ZBTB7C
ZC3H7A
ZCCHC14
ZCCHC17
ZDHHC15
ZDHHC5
ZEB1
ZFP105
ZFP128
ZFP161
ZFP187
ZFP281
ZFP3
ZFP410
ZFP423
ZFP652
ZFP691
ZFP740
ZFX
ZHX3
ZIC1
ZIC2
ZIC3
ZIC4
ZMAT2
ZMAT4
ZRSR2
ZSWIM1

## Sheet: Limb-Associated TFs
Transcription Factor
ABCF2
ACO1
ADARB1
AFF4
AGGF1
ALX3
ALX4
ANXA1
ANXA11
APEX2
AR
ARFGAP1
ARID3A
ARID3A
ARID5A
ARNT
ARNTL
ARX
ASCC1
ASCL2
ASPSCR1
ATF1
ATOH1
BARHL1
BARHL2
BARX1
BARX1
BARX2
BAX
BBX
BCL11A
BCL6
BCL6B
BHLHB2
BOLL
BRCA1
BSX
CANX
CAT
CBFA2T2
CBFB
CBX3
CBX7
CCDC25
CDX1
CDX2
CDX2
CEBPA
CEBPB
CEBPG
CFL2
CLK1
CNOT6
CPHX
CPSF4
CREB1
CREB1
CREB3L1
CRX
CRX
CSNK2B
CSTF2
CTCF
CUTL1
CUTL1
CYB5R1
CYCS
DAB2
DAZAP1
DBX1
DBX2
DDX20
DDX4
DGCR8
DHX36
DIABLO
DIS3
DLX1
DLX2
DLX3
DLX4
DLX5
DLX6
DMBX1
DNMT3A
DTL
DUS3L
DUSP22
DUSP26
E2F1
E2F2
E2F3
E2F3
E2F4
E2F6
EBF1
EBF1
ECSIT
EDN1
EEF1D
EGR1
EGR1
EGR2
EHF
EHF
EIF5A2
ELF1
ELF2
ELF3
ELF5
ELK1
ELK4
EMX2
EN1
EN1
EN2
ENO1
EOMES
ERG
ESR1
ESR2
ESRRA
ESRRA
ESRRA
ESRRB
ESX1
ESX1
ETFB
ETS1
ETS1
ETV4
EVX1
EVX1
EVX2
EWSR1
FEV
FEZ1
FEZF2
FHL2
FIP1L1
FLI1
FLI1
FOS
FOSL1
FOSL1
FOSL2
FOXA1
FOXA2
FOXA2
FOXC1
FOXD1
FOXD3
FOXF2
FOXH1
FOXI1
FOXJ1
FOXJ3
FOXK1
FOXL1
FOXL1
FOXM1
FOXN3
FOXO1
FOXP1
FOXP2
FOXP4
FOXQ1
GABPA
GABPA
GADD45A
GATA1
GATA2
GATA3
GATA3
GATA4
GATA5
GATA6
GBX1
GBX2
GCM1
GFI1
GFI1B
GIT2
GLIS2
GM397
GMEB1
GOT1
GPAM
GPD1
GRHL1
GRHPR
GSC
GTF2B
GTF2H3
GTF3C2
GTPBP1
GTPBP6
H1FX
H2AFY
H2AFZ
HBP1
HCFC2
HCLS1
HDAC8
HDX
HES5
HHAT
HHEX
HIC1
HIST1H2BN
HIST2H2AB
HIST2H2BE
HLCS
HLF
HLTF
HMBOX1
HMG20A
HMX1
HMX2
HMX3
HNF1A
HNF1B
HNF4A
HNF4A
HNF4G
HNRNPA1
HNRNPC
HOMEZ
HOXA1
HOXA10
HOXA11
HOXA13
HOXA2
HOXA3
HOXA3
HOXA4
HOXA5
HOXA5
HOXA6
HOXA7
HOXA7
HOXA9
HOXA9
HOXB13
HOXB13
HOXB3
HOXB4
HOXB5
HOXB6
HOXB7
HOXB8
HOXB9
HOXB9
HOXC10
HOXC11
HOXC12
HOXC13
HOXC4
HOXC5
HOXC6
HOXC8
HOXC9
HOXC9
HOXD1
HOXD10
HOXD11
HOXD12
HOXD13
HOXD3
HOXD3
HOXD8
HP1BP3
HSF1
HSF1
HSPA1L
HSPA5
ID2
ING3
INSM1
INSM1
IRF1
IRF1
IRF2
IRF3
IRF4
IRF5
IRF6
IRF6
IRX2
IRX3
IRX3
IRX4
IRX5
IRX6
ISGF3G
ISL2
ISX
IVD
JUN
JUNB
JUNDM2
KCNIP1
KIF22
KLF1
KLF3
KLF4
KLF4
KLF5
KLF7
LARP1
LARP4
LAS1L
LBX2
LEF1
LHX1
LHX2
LHX2
LHX3
LHX3
LHX4
LHX4
LHX5
LHX6
LHX6
LHX8
LHX9
LMX1A
LMX1B
LSM6
MAFB
MAFB
MAFF
MAFK
MAFK
MAGEA8
MAGOH
MAP4K2
MAPK1
MAX
MAX
MBTPS2
MCTP2
MDM2
MECP2
MEF2A
MEF2C
MEIS1
MEIS1
MEOX1
MEX3C
MLX
MORN1
MRG2
MRPL1
MRPL2
MRPS25
MSI1
MSI2
MSRA
MSRB3
MSX1
MSX2
MSX3
MTF1
MTHFD1
MXD4
MYB
MYB
MYBL1
MYC
MYCN
MYEF2
MYF6
MYF6
MYLK
MYOD1
MYOD1
MYOG
NANOS1
NAP1L1
NCALD
NCBP2
NELFB
NFATC2
NFATC3
NFATC4
NFE2L2
NFIB
NFIC
NFIL3
NFIL3
NFIX
NFKB1
NFYA
NFYB
NHLH1
NKX1-2
NKX2-2
NKX2-3
NKX2-3
NKX2-4
NKX2-5
NKX2-5
NKX2-6
NKX2-9
NKX3-1
NKX3-1
NKX3-1
NKX3-2
NKX6-1
NKX6-1
NKX6-3
NME1
NMI
NMRAL1
NNT
NOBOX
NONO
NR2C2
NR2E3
NR2F1
NR2F1
NR2F2
NR4A1
NR4A2
NR4A2
NR5A2
NRF1
NRL
NUCB1
NUP107
NUP133
NXPH3
OBOX1
OBOX3
OBOX5
OBOX5
OBOX6
ODC1
OLIG1
OLIG3
OSR1
OSR2
OTP
OTUD4
OTX1
OTX2
P4HB
PAX2
PAX3
PAX4
PAX4
PAX5
PAX6
PAX6
PAX7
PAXIP1
PBX1
PBX1
PCK2
PDCD11
PDE6H
PDLIM5
PDS5A
PDX1
PGAM2
PHLDA2
PHOX2A
PHOX2A
PHOX2B
PHTF1
PICK1
PIK3C3
PIR
PITX1
PITX1
PITX2
PITX3
PKNOX1
PKNOX2
PKNOX2
PLAG1
PLAGL1
PLAGL1
PLG
POLE3
POLI
POU1F1
POU2F1
POU2F2
POU2F2
POU2F3
POU3F1
POU3F2
POU3F2
POU3F3
POU3F4
POU4F3
POU4F3
POU6F1
POU6F1
PPARG
PPP1R10
PPP5C
PQBP1
PRDM1
PRDX5
PRKRIR
PRNP
PROP1
PRRX1
PRRX1
PRRX2
PRRX2
PSMA6
PSMC2
PTCD1
PTPMT1
PURG
R3HDM2
RAB14
RAB18
RAN
RARA
RARA
RARB
RARG
RAX
RAX
RBBP5
RBBP9
RBM17
RBM22
RBM3
RBM7
RBM8A
RBMS1
REL
RELA
REST
RFC2
RFX1
RFX2
RFX3
RFX3
RFX4
RFX4
RFX5
RFXANK
RFXDC2
RHOX11
RHOX11
RHOX6
RIOK2
RNASEH2C
RNF138
RPL35
RPL6
RPP25
RPS10
RPS4X
RPS6KA5
RREB1
RUFY3
RUNX1
RUNX2
RUVBL1
RXRA
RXRA
RXRA
SCMH1
SEMA4A
SF1
SF3B1
SFPI1
SFT2D1
SHOX2
SIX1
SIX2
SIX3
SIX4
SIX6
SIX6
SIX6
SLC18A1
SMAD2
SMAD3
SMAD3
SMAD4
SMUG1
SNAPC4
SND1
SNRPB2
SOCS4
SOD1
SOX1
SOX10
SOX11
SOX12
SOX13
SOX13
SOX15
SOX17
SOX17
SOX18
SOX2
SOX21
SOX3
SOX30
SOX4
SOX4
SOX5
SOX5
SOX6
SOX7
SOX8
SOX9
SP1
SP100
SP2
SP4
SPAG7
SPATS2
SPDEF
SPIB
SPR
SPZ1
SRBD1
SREBF1
SREBF2
SRF
SRF
SRP9
SSBP3
STAT1
STAT3
STAT4
STAT6
STAU2
STUB1
SUCLG1
T
TAF9
TAGLN2
TBP
TBP
TBPL1
TCEAL6
TCF12
TCF3
TCF3
TCF3
TCF7
TCFAP2A
TCFAP2B
TCFAP2C
TCFAP2E
TCFCP2L1
TEAD1
TEAD1
TFAM
TFAP2A
TFAP2A
TGIF1
TGIF1
TGIF2
THAP1
THRA
TIA1
TIMELESS
TIMM44
TITF1
TLX2
TOB2
TP63
TPI1
TPPP
TRIM21
TRIM69
TRIP10
TRMT1
TROVE2
TSC22D4
TSN
TSNAX
TULP1
U2AF1
UBB
UBE2V1
UGP2
UNCX4.1
UQCRB
USF1
USF1
USF2
USF2
USP39
UTP18
VAMP3
VAX1
VAX2
VAX2
VPS4B
VSX1
VSX1
WISP2
XRCC1
YEATS4
YWHAE
YWHAZ
YY1
ZBTB12
ZBTB12
ZBTB25
ZBTB3
ZBTB33
ZBTB4
ZBTB43
ZBTB46
ZBTB7B
ZC3H7A
ZCCHC14
ZCCHC17
ZDHHC15
ZDHHC5
ZEB1
ZFP105
ZFP128
ZFP161
ZFP187
ZFP281
ZFP3
ZFP410
ZFP423
ZFP691
ZFP740
ZFX
ZHX3
ZIC1
ZIC2
ZIC3
ZMAT2
ZMAT4
ZRSR2
ZSWIM1

## Sheet: Anc bat vs mouse all BARs - enr
Number of BARs that show enrichment (FDR < 0.05)	Transcription Factor
1	ALX3
1	ARX
1	BARX1
1	BARX2
2	E2F2
2	E2F3
1	EGR1
1	EGR2
5	GLIS2
1	HOXA5
1	KLF7
1	LHX1
1	LHX6
1	LMX1B
1	MEF2A
12	NR2C2
1	PAX7
6	PLAGL1
1	PRRX2
1	SOX21
12	SP4
1	TBP
4	TCFAP2A
2	TCFAP2B
3	TCFAP2C
3	TCFAP2E
5	ZBTB7B
2	ZFP105
5	ZFP161
12	ZFP281
13	ZFP740
4	ZIC1
5	ZIC2
4	ZIC3

## Sheet: Anc bat vs mouse all BARs - dep
Number of BARs that show depletion (FDR < 0.05)	Transcription Factor
1	ALX3
1	ARID5A
3	ASCL2
2	ATF1
1	BARHL1
1	BARX1
2	BARX2
1	BBX
1	BCL6
3	BCL6B
1	BSX
1	CDX1
2	CPHX
2	CUTL1
3	DBX1
2	DBX2
1	DLX1
1	DLX2
2	DLX3
1	DLX4
2	DLX5
1	E2F3
3	EGR2
1	EHF
1	EMX2
1	EN2
2	ESR2
1	ESRRA
1	ESRRB
1	EVX1
1	EVX2
2	GBX1
2	GBX2
3	GM397
1	HBP1
1	HIST1H2BN
1	HMBOX1
1	HMX1
1	HMX2
1	HNF1A
2	HNF4A
1	HNF4G
1	HOXA11
1	HOXA2
1	HOXA4
1	HOXA5
3	HOXA7
1	HOXB3
1	HOXB5
1	HOXB6
2	HOXB7
1	HOXB8
1	HOXC10
1	HOXC11
1	HOXC5
2	HOXC8
1	HOXD1
1	HOXD11
1	HOXD3
2	HOXD8
2	IRX2
2	IRX3
2	IRX4
2	IRX5
2	IRX6
1	ISGF3G
1	ISL2
1	ISX
2	JUNDM2
1	LBX2
1	LEF1
1	LHX2
1	LHX4
1	LHX6
2	LHX8
1	LMX1A
1	LMX1B
2	MAFB
1	MAFF
2	MAFK
2	MEIS1
2	MEOX1
2	MRG2
1	MSX1
1	MSX2
1	MYBL1
3	MYF6
2	NFIC
1	NFYA
1	NHLH1
1	NKX1-2
2	NKX2-2
2	NKX2-3
1	NKX2-5
1	NKX2-9
2	NKX3-1
2	NKX6-1
1	NKX6-3
1	NR2F1
1	NR2F2
1	OSR1
3	OSR2
1	PBX1
2	PKNOX1
2	PKNOX2
1	POU1F1
1	POU2F1
1	POU2F2
1	POU3F1
1	POU3F2
1	POU3F4
1	PRRX2
2	RARA
1	RFX4
4	RHOX11
1	RHOX6
1	RXRA
1	SFPI1
1	SIX1
1	SIX3
2	SIX6
1	SMAD3
1	SOX1
1	SOX12
1	SOX13
1	SOX15
1	SOX18
1	SOX21
1	SOX30
1	SOX5
2	STAT1
1	STAT3
1	STAT4
2	TCFCP2L1
2	TGIF1
2	TGIF2
1	TITF1
3	TLX2
1	VAX1
1	VAX2
1	ZBTB12
3	ZBTB3
2	ZFP105
2	ZFP161
1	ZFP187
3	ZFP691
